1           **Dopamine release in nucleus accumbens core during social behaviors in mice**

2                           Bing Dai<sup>1,4</sup>, Fangmiao Sun<sup>2</sup>, Amy Kuang<sup>1</sup>, Yulong Li<sup>2</sup>, Dayu Lin<sup>1,3,4</sup>

3

4           <sup>1</sup>Neuroscience Institute, New York University School of Medicine, New York, NY, USA

5

6           <sup>2</sup>State Key Laboratory of Membrane Biology, Peking University School of Life Sciences, Beijing,

7           China; PKU-IDG/McGovern Institute for Brain Research, Beijing, China; Peking-Tsinghua

8           Center for Life Sciences, Beijing, China

9

10          <sup>3</sup>Department of Psychiatry, New York University School of Medicine, New York, NY, USA;

11          Center for Neural Science, New York University, New York, NY, USA

12

13          <sup>4</sup>Correspondence: [Bing.Dai@nyulangone.org](mailto:Bing.Dai@nyulangone.org) (B.D.) and [Dayu.Lin@nyulangone.org](mailto:Dayu.Lin@nyulangone.org) (D.L.)

14

15

## 16 **Abstract**

17 Social behaviors are among the most important and rewarding motivational behaviors. How  
18 dopamine, a “reward” signal, releases in the nucleus accumbens (NAc) during social behaviors  
19 has become a topic of interest for decades. However, limitations in early recording methods,  
20 such as microdialysis, prevented a complete understanding of moment-to-moment dopamine  
21 responses during social behaviors. Here, we employ a genetically encoded dopamine sensor,  
22 GRAB<sub>DA2h</sub>, to record dopamine activity in the NAc core in mice and find acute changes in  
23 extracellular dopamine levels during all three phases of social behaviors: approach,  
24 investigation and consummation. Dopamine release during approach phase correlates with  
25 animal’s motivation towards the conspecific whereas its release during consummatory phase  
26 signals the valence of the experience. Furthermore, dopamine release during sexual and  
27 aggressive behaviors shows sex differences that correlate with the potential value of those  
28 experiences. Overall, our results reveal rich and temporally precise motivation and value  
29 information encoded by NAc dopamine during social behaviors and beyond.

30

## 31 **Introduction**

32 The dopaminergic input from ventral tegmental area (VTA) to nucleus accumbens (NAc)  
33 is well known for its relevance to reward, but how so? One function of NAc dopamine release is  
34 to signal reward expectation which could be used as a motivating signal. In support of this  
35 hypothesis, altering the dopamine release artificially increases the willingness to work (Hamid et  
36 al., 2016; Phillips et al., 2003). The other function of NAc dopamine is to signal errors in reward  
37 prediction, providing a learning signal to guide future behavior (Bayer and Glimcher, 2005;  
38 Eshel et al., 2016). In cases when a reward arrives unexpectedly or in other words, the  
39 predicted value is zero, the reward prediction error is equivalent to the actual value of a  
40 stimulus. Thus, dopamine could signal the motivation to achieve a goal before the goal is  
41 obtained and the value of the goal upon obtaining it.

42 Social behaviors, such as sexual and parental behaviors, are among the most important  
43 and rewarding motivated behaviors (Trezza et al., 2011). The end goals of these behaviors,  
44 e.g., reproduction and fostering youngsters, are essential for the survival of a species. Thus,  
45 animals are innately motivated to engage in social behaviors and in some cases, willing to work  
46 hard for such opportunities. Social behaviors are intrinsically rewarding and can serve as  
47 unconditioned stimulus (US) for associative learning. For example, male and female rodents will

48 establish a preference for the context associated with copulation and postpartum female rats will  
49 learn to lever press to gain access to a pup (Hauser and Gandelman, 1985; Tzschentke, 2007;  
50 Wilsoncroft, 1968).

51 Many studies have been carried out since the early 90s to ask whether and how  
52 dopamine level changes in NAc during social behaviors. Early microdialysis studies with a  
53 temporal resolution of minutes revealed a gradual increase of dopamine in NAc in male rats that  
54 copulated to ejaculation with receptive females (Damsma et al., 1992; Fumero et al., 1994;  
55 Pfaus et al., 1990; Pleim et al., 1990; Wang et al., 1995; Wenkstern et al., 1993). Later  
56 voltammetry recording with a higher temporal resolution (subsecond to second) found that  
57 dopamine transients increase mainly during initial female encounter but not during  
58 consummatory phase of sexual behaviors, such as deep thrust (Robinson et al., 2002). This is  
59 surprising given that consummatory sexual actions are required for establishing conditioned  
60 place preference – typically a dopamine-dependent learning process (Kippin and Pfaus, 2001;  
61 Tenk et al., 2009). Recently, we used a genetically encoded dopamine sensor, namely GRAB<sub>DA</sub>,  
62 to optically record the dopamine signal in NAc in male mice with millisecond resolution and  
63 found time-locked dopamine increase during each episode of thrust and ejaculation, supporting  
64 a role of dopamine in encoding the hedonic value of sexual behaviors (Sun et al., 2018; Sun et  
65 al., 2020). This result suggests that the early recording methods may lack the temporal  
66 resolution and sensitivity to reveal the full details of dopamine responses during social  
67 behaviors.

68 Similar to male sexual behaviors, dopamine increase in NAc during female sexual  
69 behaviors and pup interactions have been reported using microdialysis and to a lesser extent  
70 voltammetry (Afonso et al., 2008; Afonso et al., 2009; Afonso et al., 2013; Becker et al., 2001;  
71 Champagne et al., 2004; Hansen et al., 1993; Jenkins and Becker, 2003; Kohlert and Meisel,  
72 1999; Lavi-Avnon et al., 2008; Meisel et al., 1993; Mermelstein and Becker, 1995; Pfaus et al.,  
73 1995; Shnitko et al., 2017). These studies unequivocally suggested that the dopamine release  
74 in NAc is correlated with the animal's sexual or maternal motivation (Afonso et al., 2009;  
75 Champagne et al., 2004; Kohlert and Meisel, 1999; Mermelstein and Becker, 1995). However,  
76 considering the poor temporal resolution of microdialysis, dopamine responses during individual  
77 behavioral events, especially those lasting for just a second or two, remain unclear. It also  
78 remains to be determined whether the slow changes in dopamine levels truly reflects slow  
79 dynamics of dopamine or whether they simply reflect methodological limitations. Furthermore,  
80 nearly all studies on parental behaviors have focused on mothers probably due to the fact that

81 mother is the main care giver. One study showed that dopamine release to pups in NAc in naïve  
82 and pair-bonded male prairie voles are quantitatively similar although pair-bonded males show  
83 enhanced paternal behavior (Lei et al., 2017). These results raise the question of whether pup-  
84 triggered dopamine release in males varies with the paternal state as is the case in females  
85 (Afonso et al., 2008; Afonso et al., 2009; Champagne et al., 2004).

86 Aggression is another important type of motivational behaviors towards a social target.  
87 Animals are willing to work for the opportunity to attack a conspecific, especially when the  
88 outcome of attack is likely winning (Falkner et al., 2016; Fish et al., 2005; Fish et al., 2002; Fish  
89 et al., 2008; Golden et al., 2017; Golden et al., 2019c; May and Kennedy, 2009). Winning also  
90 supports associative learning: animals demonstrate a preference for the context where winning  
91 occurs (Aleyasin et al., 2018; Golden et al., 2016; Golden et al., 2019c; Martinez et al., 1995;  
92 Stagkourakis et al., 2018). Several studies investigated changes in dopamine levels related to  
93 aggressive behaviors and found a slow and sustained increase in NAc (Beiderbeck et al., 2012;  
94 van Erp and Miczek, 2000). However, unlike sexual and parental behaviors, dopamine rises  
95 slowly and can remain elevated for over an hour (Beiderbeck et al., 2012; van Erp and Miczek,  
96 2000). Whether the particularly slow dynamics reflect a qualitative difference in dopamine  
97 release associated with aggressive vs. other social behaviors or whether they are merely  
98 caused by low sampling rates remain to be investigated. Further complicating the findings is the  
99 observation that NAc dopamine also increases after defeat (Tidey and Miczek, 1996). Since  
100 defeat is clearly a negative experience, it suggests that dopamine increase during social  
101 behaviors may signal salience instead of valence. Indeed, dopamine in NAc may signal both  
102 salience and valence depending on the subregion. While dopamine increases to stimuli of both  
103 positive and negative valence in the ventral NAc shell, dopamine only signals positive valence in  
104 other parts of NAc (de Jong et al., 2019; Yuan et al., 2019).

105 Taken together, while dopamine release in NAc during social behaviors has been a topic  
106 of interest for the last three decades, many questions remain unaddressed largely due to  
107 technical limitations, heterogeneity of release pattern in NAc and differences in methodological  
108 details across studies. Thus, the goal of our current study is to comprehensively investigate the  
109 dopamine release in NAc during social behaviors using an optical recording method with fast  
110 temporal resolution and cell type specificity. By recording from both males and females, our  
111 study also examined potential sexual dimorphism in dopamine release during social behaviors.  
112 Here, we specifically focused on NAc core given that this region is known to signal both

113 motivation and reward, two important variables relevant for social behaviors (Hamid et al.,  
114 2016).

115

## 116 **Results**

### 117 **Dopamine release in NAc core during approach and investigation**

118 To engage in social behaviors, animals need to first reach a social target. In laboratory  
119 settings, this “approach” phase mainly consists of one animal walking towards another animal in  
120 the same arena although more complicated movements, e.g., lever pressing or grid cross, can  
121 also be involved (Golden et al., 2019c; Trezza et al., 2011; Wei et al., 2021). The seeking  
122 behavior, most common approaching behavior, reflects an animal’s motivation to a social target  
123 and the relevant consummatory social actions. Upon gaining access to the social target, the  
124 animal investigates it closely. After variable time of investigation, the consummatory action is  
125 initiated. Although interaction with a social target alone can be rewarding, the consummatory  
126 social actions are of higher hedonic value as social behavior-dependent associative learning  
127 typically requires the successful completion of consummatory social actions (Trezza et al.,  
128 2011).

129 To understand how dopamine levels change during different stages of social behaviors,  
130 we performed optical recording of the dopamine signal by virally expressing Cre-dependent  
131 (Cre-on) GRAB<sub>DA2h</sub>, a genetically encoded fluorescent DA sensor, unilaterally or bilaterally in the  
132 NAc core of *Drd1*-Cre mice, and implanting 400- $\mu$ m multimode optic fiber(s) immediately above  
133 the virus injection site(s) for light delivery and collection (Sun et al., 2018; Sun et al., 2020). In a  
134 subset of animals, we also injected Cre-on or Cre-off GRAB<sub>DA2h</sub> virus into the contralateral side  
135 of the NAc core to compare dopamine release onto D1R and non-D1R cells (**Figure 1a-1c**).  
136 Control animals were injected with Cre-on GFP virus on both sides. Only animals with correct  
137 fiber targeting are included in the analysis (**Figure 1 – figure supplement 1**).

138 In animals with bilateral GRAB<sub>DA</sub> expression in D1R cells of NAc core, we observed  
139 highly correlated activity regardless of the presence of an intruder animal, suggesting  
140 synchronized dopamine release in the two hemispheres (**Figure 1d, 1g and 1j**). Furthermore, in  
141 animals with GRAB<sub>DA</sub> expression in D1R and non-D1R cells in the contralateral sides of NAc  
142 core, we observed similarly highly correlated dopamine signals, suggesting that D1R and non-  
143 D1R cells are likely sense similar level of dopamine fluctuation (**Figure 1e, 1h and 1j**). Of note,

# Figure 1

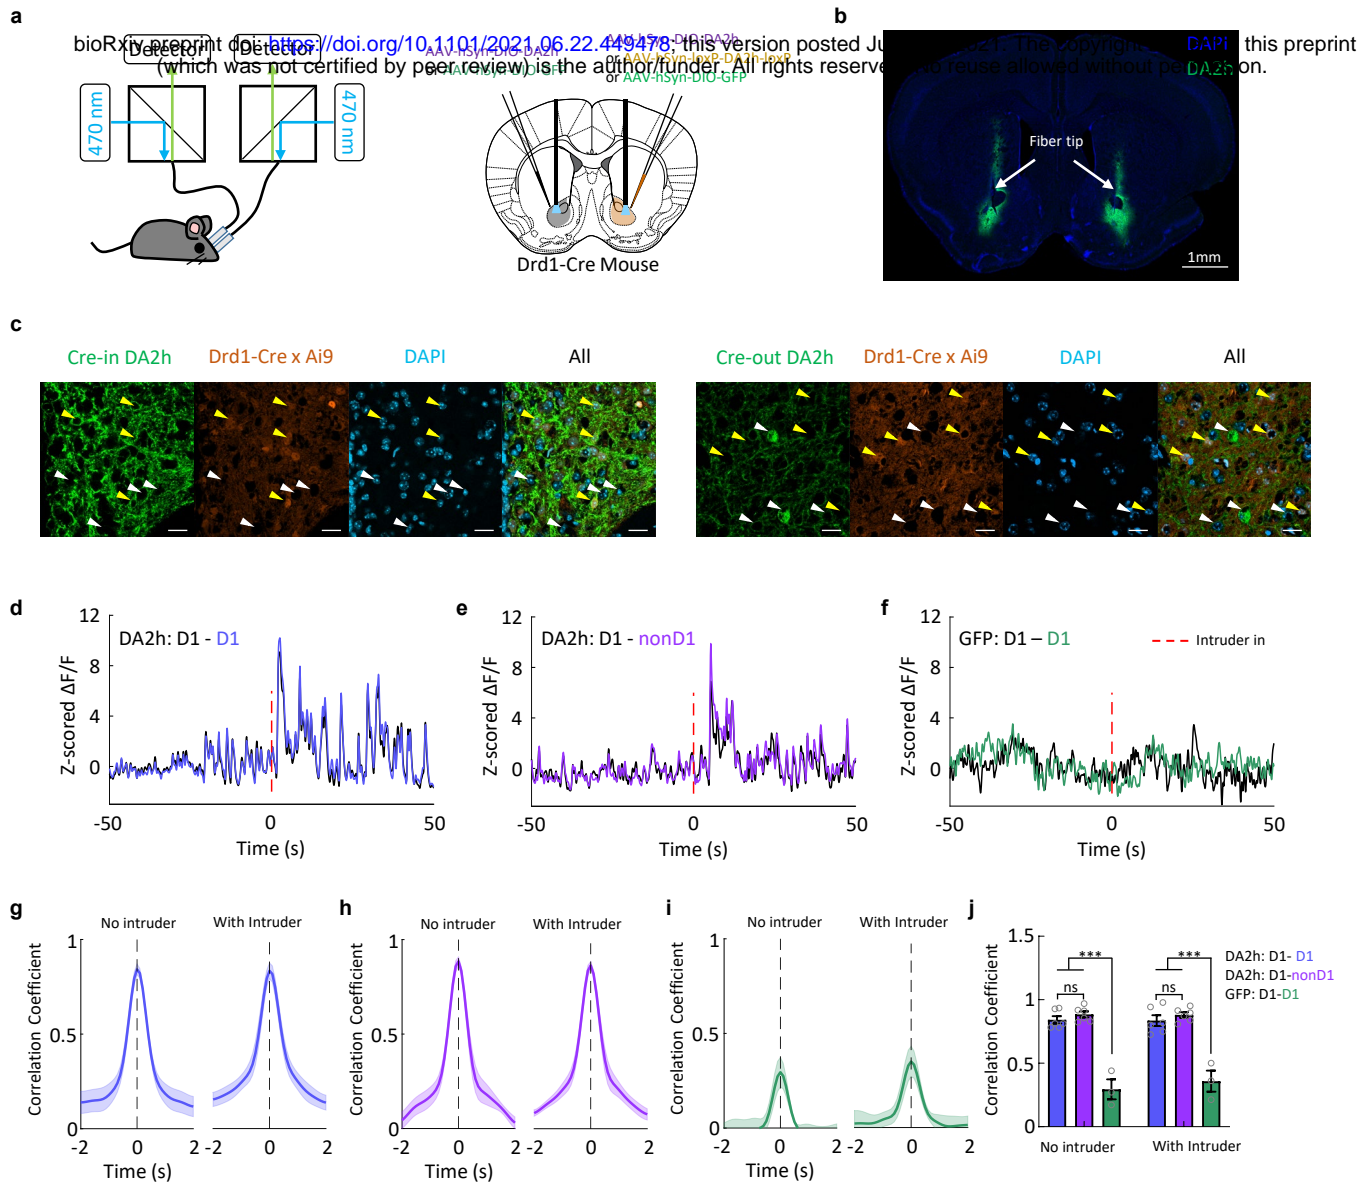

**Figure 1. DA release sensed by D1 cells and non-D1 cells are highly correlated.**

**a**, Schematic illustration of the recording setup and virus injection. Atlas image is adopted from (Franklin and Paxinos, 2013)

**b**, Representative image showing the expression of GRAB<sub>DA2h</sub> in both hemispheres and optic fiber tracks. (Scale bar, 1mm.)

**c**, Representative images showing the expression of GRAB<sub>DA2h</sub> in D1 cells (left, yellow arrows) in an animal injected with Cre-in virus and in non-D1 cells (right, white arrows) in an animal injected with Cre-out virus. (Scale bar, 20μm.)

**d**, Representative traces of GRAB<sub>DA2h</sub> from D1R cells in both hemispheres. Time 0 indicates when a conspecific intruder is introduced. Similar results were observed from six mice.

**e**, Representative traces of GRAB<sub>DA2h</sub> from D1R cells in one hemisphere and that of non-D1R cells in the other hemisphere. Time 0 indicates when a conspecific intruder is introduced. Similar results were observed from six mice.

**f**, Representative traces of GFP from D1R cells in both hemispheres. Similar results were observed from three mice.

**g**, The time shifted correlation coefficient between the GRAB<sub>DA2h</sub> signals from two hemispheres before and after the introduction of an intruder. Shaded area: s.e.m. (n=6 mice.)

**h**, The time shifted correlation coefficient between GRAB<sub>DA2h</sub> in D1R and non-D1R cells in two different hemispheres before and after an intruder introduction. Shaded area: s.e.m. (n=6 mice.)

**i**, The time shifted correlation coefficient between GFP in D1R cells from different hemispheres before and after intruder introduction. Shaded area: s.e.m. (n=3 mice.)

**j**, Group summary of peak correlation coefficients of GRAB<sub>DA2h</sub> or GFP signals between hemispheres. Mean ± s.e.m overlaid for each group. (n= 6 mice for each GRAB<sub>DA2h</sub> group and n=3 for the GFP group. Bonferroni's multiple comparisons following two-way ANOVA. \*\*\*p<0.001.)

144 this does not rule out the possibility that D1R and non-D1R cells sense different dopamine  
145 inputs at the microscopic level since it is beyond the spatial resolution allowed by our recording  
146 method (Liu et al., 2018). The highly synchronized activity was not due to signal fluctuation  
147 related to locomotion. In animals with bilateral GFP expression, we observed significantly lower  
148 correlation in fluorescence signals between the two hemispheres (**Figure 1f, 1i and 1j**). Given  
149 the highly correlated dopamine signal sensed by D1R and non-D1R cells, our subsequent  
150 recordings were only obtained from D1R cells in NAc core (**Figures 2a-2c**).

151 During each recording session, we sequentially introduced a conspecific male, a female,  
152 and a novel object into the tested mouse's home cage, each for 10 minutes or until ejaculation  
153 was achieved in the case of opposite sex interaction. Upon introduction of a stimulus, the home-  
154 cage animal approached the target quickly. For both male and female, the latency to approach a  
155 social target was shorter than that towards an object (**Figures 2d-2e**). At the approach onset --  
156 defined as the first step towards the target, the dopamine level was not elevated, suggesting  
157 that dopamine increase was unlikely to play a role in initiating approach (**Figure 2f-2i**). During  
158 approach, dopamine levels gradually increased (**Figure 2g-2h**). For males, the maximum  
159 dopamine increase during approaching a female was significantly higher than that during  
160 approaching an object (Female vs Object:  $p = 0.04$ , one-way ANOVA followed by Tukey's  
161 multiple comparisons test) whereas females showed comparable dopamine increase during  
162 approach towards all targets (**Figure 2j-2l**). At the offset of approach, which is often followed by  
163 other social behaviors, e.g., investigation, the dopamine remained significantly elevated (**Figure**  
164 **2j-2l**). We next asked whether the dopamine increase during approach adapted over trials and  
165 found no consistent decrease especially towards a social target of the opposite sex (**Figure 2m-**  
166 **o**).

167 To address whether the response during approach was due to movement per se, we  
168 tracked the position of the test animal in the absence of an intruder and identified time points  
169 when the animal initiated locomotion (**Figure 2 – figure supplement 1a-1b**). No increase in  
170 dopamine activity was observed at the onset of locomotion (**Figure 2 – figure supplement 1c-**  
171 **1d**). In fact, dopamine slightly but significantly decreased when the animal initiated locomotion  
172 and the movement velocity was significantly negatively correlated with the dopamine signal,  
173 suggesting that the dopamine increase during approach was not due to locomotion itself  
174 (**Figure 2 – figure supplement 1c-1f**).

175 Upon reaching the target, test animals closely investigate the stimulus. For both females  
176 and males, the average duration of investigation bout was longer towards social targets than

# Figure 2

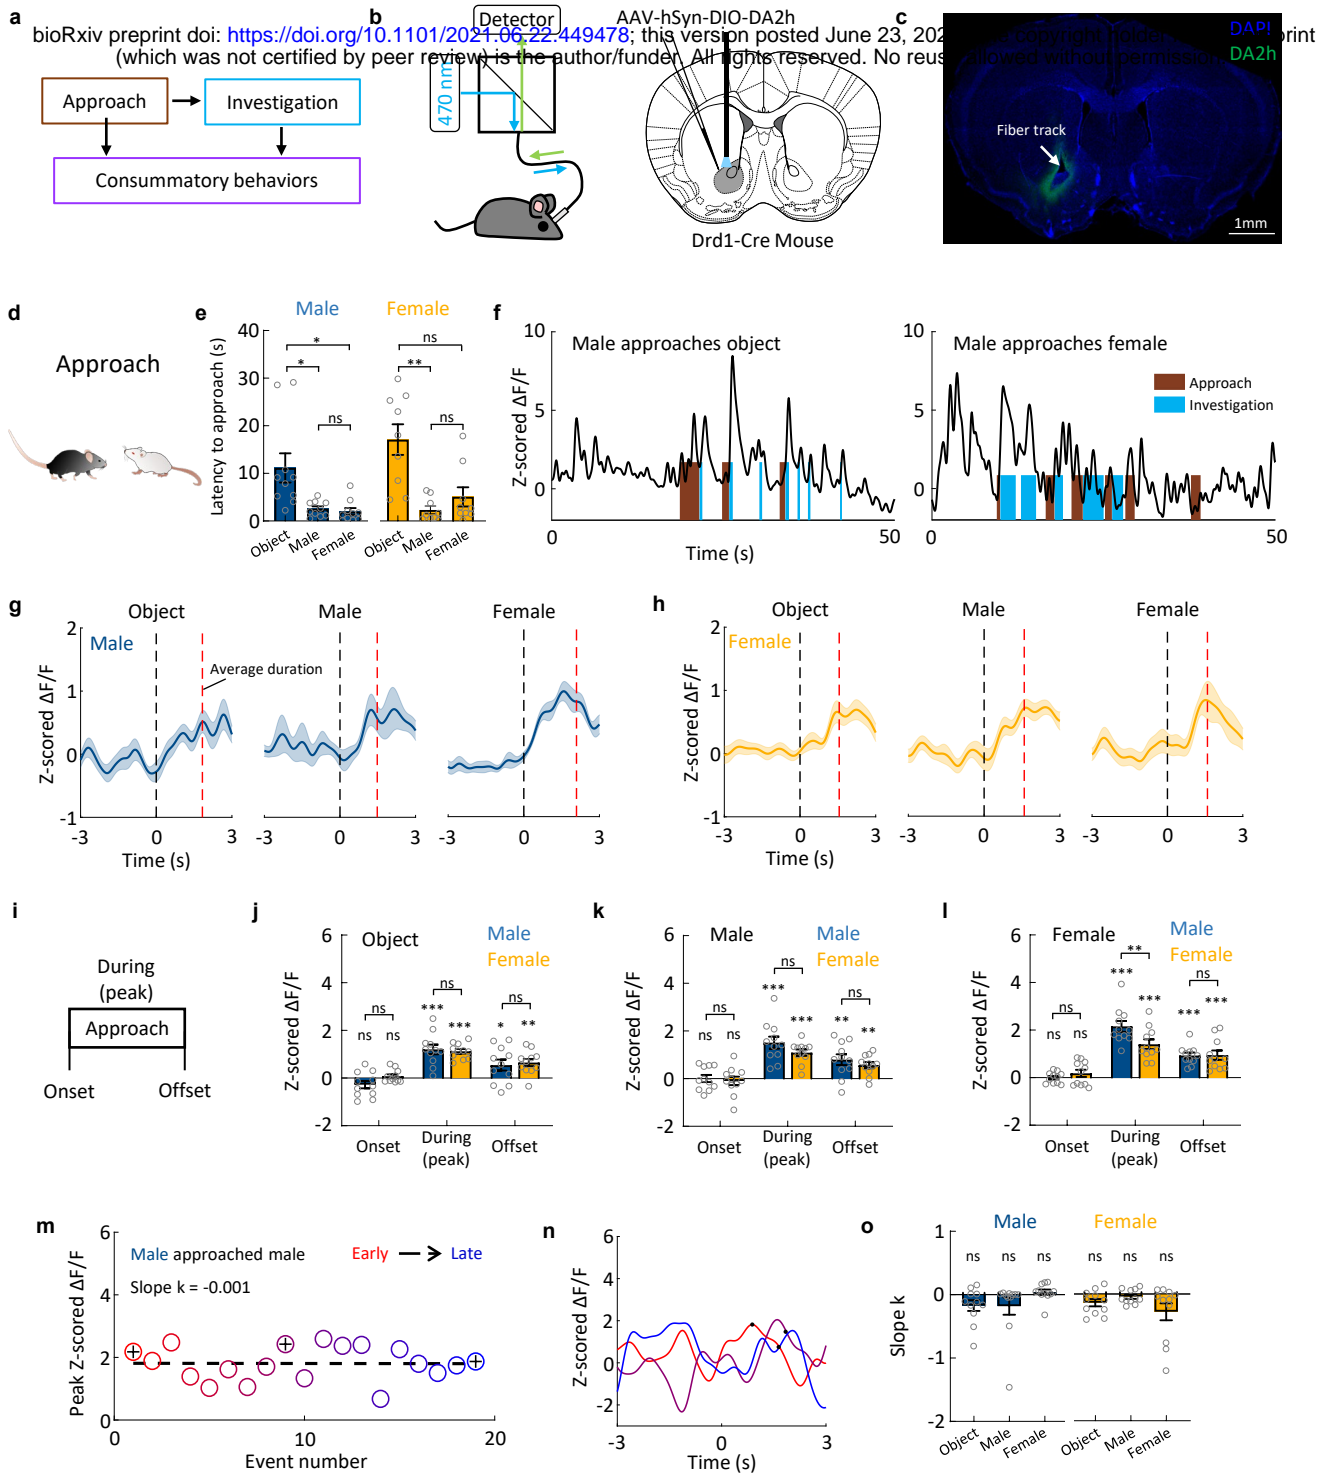



**Figure 2. DA responses during approaching social and non-social targets.**

- a**, Schematics illustrating different stages of social behaviors.
- b**, Schematics illustrating the experimental design.
- c**, Representative image showing the expression of GRAB<sub>DA2h</sub> and optic fiber track. (Scale bar, 1mm.)
- d**, A cartoon illustration of approaching behavior.
- e**, Group summary of the latency to approach towards different targets in male (blue) and female mice (yellow). Mean  $\pm$  s.e.m overlaid with individual data points for each group. (n=10 male mice, Friedman test, p=0.007; n=10 female mice, Friedman test, p=0.006. Dunn's multiple comparisons post-tests revealed the difference within male and female groups, \*p<0.05, \*\*p<0.01)
- f**, Representative traces of Z scored  $\Delta F/F$  of GRAB<sub>DA2h</sub> during social interaction from an example male mouse. Color shades indicate annotated behaviors. Similar results were observed from 11 male mice and 11 female mice.
- g**, Average post-event histograms aligned to the onset of approach for male mice. Shaded area: s.e.m. (n=11 mice.)
- h**, Average post-event histograms aligned to the onset of approach for female mice. Shaded area: s.e.m. (n=11 mice.)
- i**, Schematics showing the time periods used for characterizing DA responses related to approach.
- j-l**, Summary of Z scored GRAB<sub>DA2h</sub> responses at the onset and offset of, and during approach a novel object (j), a male conspecific (k) and a female conspecific (l). (n=11 male mice and n=11 female mice. One sample t test followed by FDR correction (FDR = 0.05) to reveal significant responses. \*p<0.05, \*\*p<0.01, \*\*\*p<0.001. Bonferroni's multiple comparisons following two way ANOVA revealed no difference in responses between males and females. \*\*p<0.01)
- m**, A scatter plot showing peak response during repeated approach trials from one example male-male encounter session.
- n**, Representative GRAB<sub>DA2h</sub> traces from early and late approach bouts. Black dots indicate the offset of behavior episodes.
- o**, Summary of slope k of GRAB<sub>DA2h</sub> responses over repeated approach episodes. (n=11 male mice and n=11 female mice. One sample Wilcoxon test followed by FDR correction (FDR = 0.05).

177 that towards novel objects (**Figure 3b**). Dopamine levels at the onset of investigation were  
178 already significantly elevated above the baseline, likely due to the dopamine increase during  
179 approach (**Figures 3c-3m**). During investigation, the dopamine further rose transiently before it  
180 dropped (**Figures 3d-3m**). At the offset of social investigation, the dopamine level largely  
181 returned to the baseline level in males and is slightly elevated in females (**Figure 3k-3m**). The  
182 peak dopamine increases during investigation of social targets were significantly higher than  
183 that during object investigation (Male: male vs object:  $p < 0.001$ ; female vs object:  $p = 0.009$ .  
184 Female: male vs object:  $p = 0.01$ ; female vs object:  $p = 0.005$ . One-way ANOVA followed by  
185 Tukey's multiple comparisons test). Dopamine response during investigation adapted quickly  
186 regardless of the targets (**Figures 3n-3p**). On average, dopamine increase during the tenth  
187 investigation bout was around 20-40% of the first bout (**Figure 3q**).

188

### 189 **Dopamine release in NAc core during sexual behaviors**

190 During male and female encounters, after a period of investigation, male mice initiate  
191 mounting towards the females. We used sexually experienced males and they often attempt to  
192 mount females regardless of the female's receptivity level. In these males, the dopamine  
193 dynamic during mounting towards receptive and non-receptive females was similar: it was  
194 elevated at the mounting onset, continued to rise transiently during mounting before dropping  
195 below the baseline at the offset of mounting if the mounting did not transition into intromission  
196 (**Figures 4a-4e and 4j-4l**). Furthermore, the dopamine suppression remained for at least one  
197 second after mounting termination (**Figures 4k-4l**). A different pattern of dopamine release was  
198 observed in females. Both non-receptive and receptive females showed no change in dopamine  
199 level at the onset of being mounted (**Figures 4d-4e and 4k-4l**) When being mounted, non-  
200 receptive female showed a decrease in dopamine which was maintained throughout the  
201 behavior and for at least one second after male stopped mounting (**Figures 4c-4d and 4k**). In  
202 contrast, when being mounted, receptive females showed a transient increase in dopamine  
203 which returned to baseline at the offset (**Figures 4c, 4e and 4l**)

204 If the females are receptive, males advance mounting to intromission, a rhythmic pelvic  
205 movement presumably resulting in penile insertion. At the onset of intromission (the same  
206 moment as mounting offset), dopamine level was significantly elevated and continued to rise for  
207 approximately one second before it gradually decreased to the baseline level at the offset of  
208 intromission (**Figures 4b, 4f-4g and 4m**). If the intromission did not transition to ejaculation,

# Figure 3

bioRxiv preprint doi: <https://doi.org/10.1101/2021.06.22.449478>; this version posted June 23, 2021. The copyright holder for this preprint (which was not certified by peer review) is the author/funder. All rights reserved. No reuse allowed without permission.

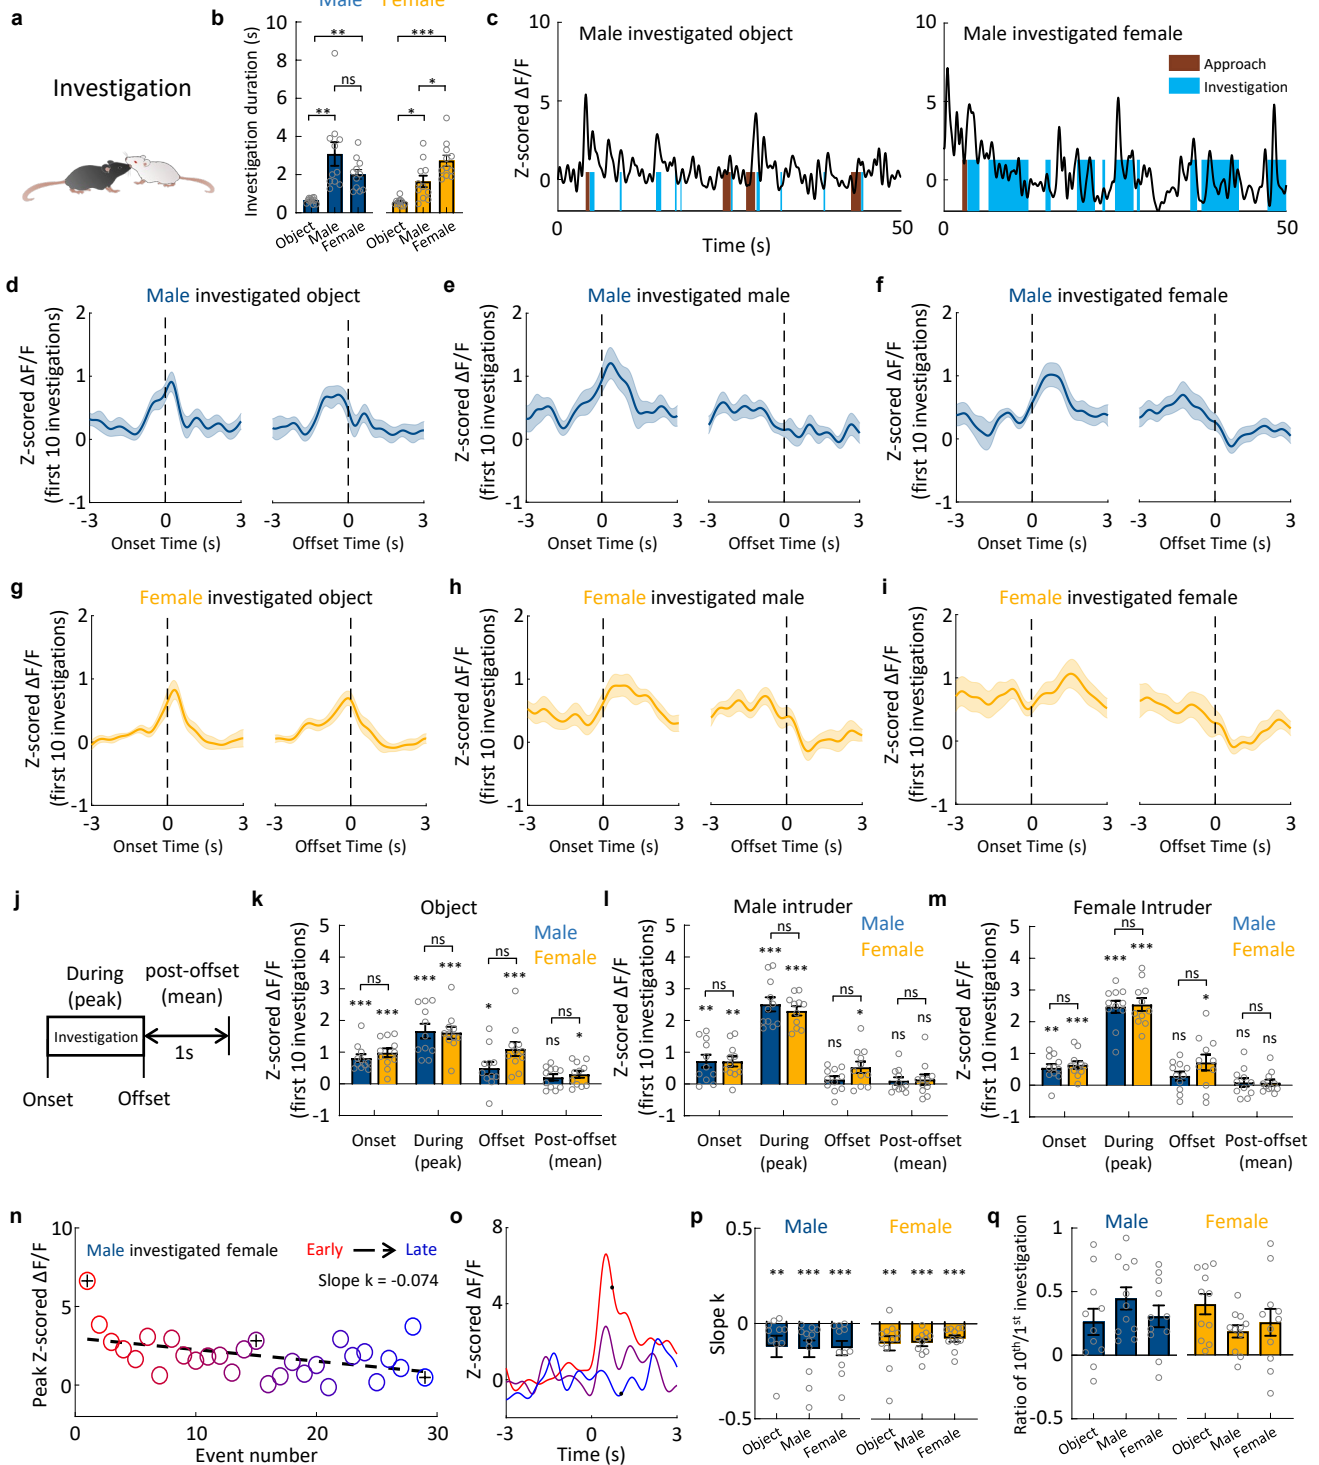

**Figure 3. DA responses during male and female investigatory behaviors.**

**a**, A cartoon illustration of social investigation.

**b**, Summary of average investigation durations towards various targets in male and female mice. Mean  $\pm$  s.e.m overlaid with individual data points for each group. (n=11 male mice, one-way ANOVA,  $F(1.203, 12.03)=9.151$ ,  $p=0.008$ ; n=11 female mice, one-way ANOVA,  $F(1.938, 19.38)=24.43$ ,  $p<0.001$ . Tukey's multiple comparisons post-tests revealed the differences within male and female groups,  $*p<0.05$ ,  $**p<0.01$ ,  $***p<0.001$ .)

**c**, Representative traces of Z scored  $\Delta F/F$  of GRAB<sub>DA2h</sub> during object and female interaction from an example male mouse. Similar results were observed from 11 male mice and 11 female mice.

**d-i**, Average post-event histograms aligned to the onset (left) and offset (right) of investigation towards object (**d**), a male intruder (**e**) and a female intruder (**f**). Shaded area: s.e.m. (n=11 male mice and 11 female mice.)

**j**, Schematics showing the time periods used for characterizing DA responses related to investigation.

**k-m**, Summary of Z scored GRAB<sub>DA2h</sub> responses at the onset and offset of, during and after investigating a novel object (**k**), a male mouse (**k**) and a female mouse (**m**). Signal changes across bouts. Mean  $\pm$  s.e.m overlaid with individual data points for each group. (n=11 male mice and n=11 female mice. One sample t test followed by FDR correction revealed significant responses,  $*p<0.05$ ,  $**p<0.01$ ,  $***p<0.001$ . Bonferroni's multiple comparisons following two-way ANOVA revealed no difference between male's and female's responses.)

**n**, A scatter plot showing peak responses during repeated investigation trials from one example session of male-female encounter.

**o**, Representative GRAB<sub>DA2h</sub> traces from early and late investigation bouts. Black dots mark the end of investigation.

**p**, Summary of slope k of GRAB<sub>DA2h</sub> responses over repeated investigation events. Mean  $\pm$  s.e.m overlaid with individual data points for each group. (n=11 male mice and n=11 female mice. One sample Wilcoxon rank test followed by FDR correction revealed significant adaptations.  $**p<0.01$ ,  $***p<0.001$ .)

**q**, The ratio of peak DA signals during the tenth investigation bout to that of the first bout. Mean  $\pm$  s.e.m overlaid individual data points for each group. (n=11 male mice and n=11 female mice.)

209 dopamine decreased below the baseline for at least one second after intromission terminated  
210 (**Figures 4g and 4m**). In females, while the dopamine level was also elevated at the onset of  
211 being intromitted, it gradually and monotonically decreased and returned to the baseline at the  
212 offset of being intromitted without further post-behavior change (**Figures 4c, 4g and 4m**). After  
213 repeated intromission, males achieve ejaculation which is characterized as a sudden cessation  
214 of all movements. Ejaculation resulted in the highest dopamine release in both males and  
215 females, but there was a noticeable temporal difference (**Figures 4b-4c, 4h-4i and 4n**). While  
216 dopamine increased sharply in males at the onset of ejaculation, the dopamine increase in  
217 females occurred approximately 2 s after the male ejaculation (**Figure 4i**). Within 5 seconds  
218 after the onset of male ejaculation, dopamine reached its peak level and then gradually  
219 decreased (**Figure 4h**). At the ejaculation offset, defined as the moment when male resumes  
220 movement, dopamine levels have returned to baseline and no further post-ejaculation dopamine  
221 changes were observed (**Figure 4n**). Lastly, in contrast to the gradual decrease of dopamine  
222 release during investigation, the peak dopamine release during sexual actions was either  
223 unchanged or slightly increased over repeated trials (**Figure 4o**).

224

## 225 **Dopamine release in NAc core during aggressive behaviors**

226 When the males encounter male intruders, they initiate attack after a period of  
227 investigation. At the onset of each attack, dopamine levels were already elevated, likely due to  
228 increase during approach or investigation (**Figures 5b-5c, 5f**). During attack, dopamine rose  
229 transiently, reached peak and then dropped (**Figures 5b-5c and 5f**). At the offset of attack,  
230 dopamine levels remained above the baseline but quickly returned to pre-attack levels within  
231 one second (**Figure 5b-5c and 5f**). The maximum dopamine increase during male aggression  
232 was quantitatively comparable to the dopamine increase during sexual intercourse and  
233 consuming palatable food (i.e. peanut butter), supporting the notion that aggression could be  
234 rewarding (**Figure 5- figure supplement 1**).

235 Non-lactating female mice typically show little aggression towards conspecific intruders.  
236 During lactation, however, females show a marked increase in aggression towards all intruders  
237 except pups, a phenomenon known as maternal aggression (St John and Corning, 1973).  
238 Maternal aggression contains both offensive and defensive attacks and its main purpose is to  
239 protect the young (Ferrari et al., 2000; Flannelly and Flannelly, 1985). In comparison to male  
240 aggression, peak dopamine increase during female attack was significantly lower (**Figures 5f**).

# Figure 4

bioRxiv preprint doi: <https://doi.org/10.1101/2021.06.22.449478>; this version posted June 23, 2021. The copyright holder for this preprint (which was not certified by peer review) is the author/funder. All rights reserved. No reuse allowed without permission.

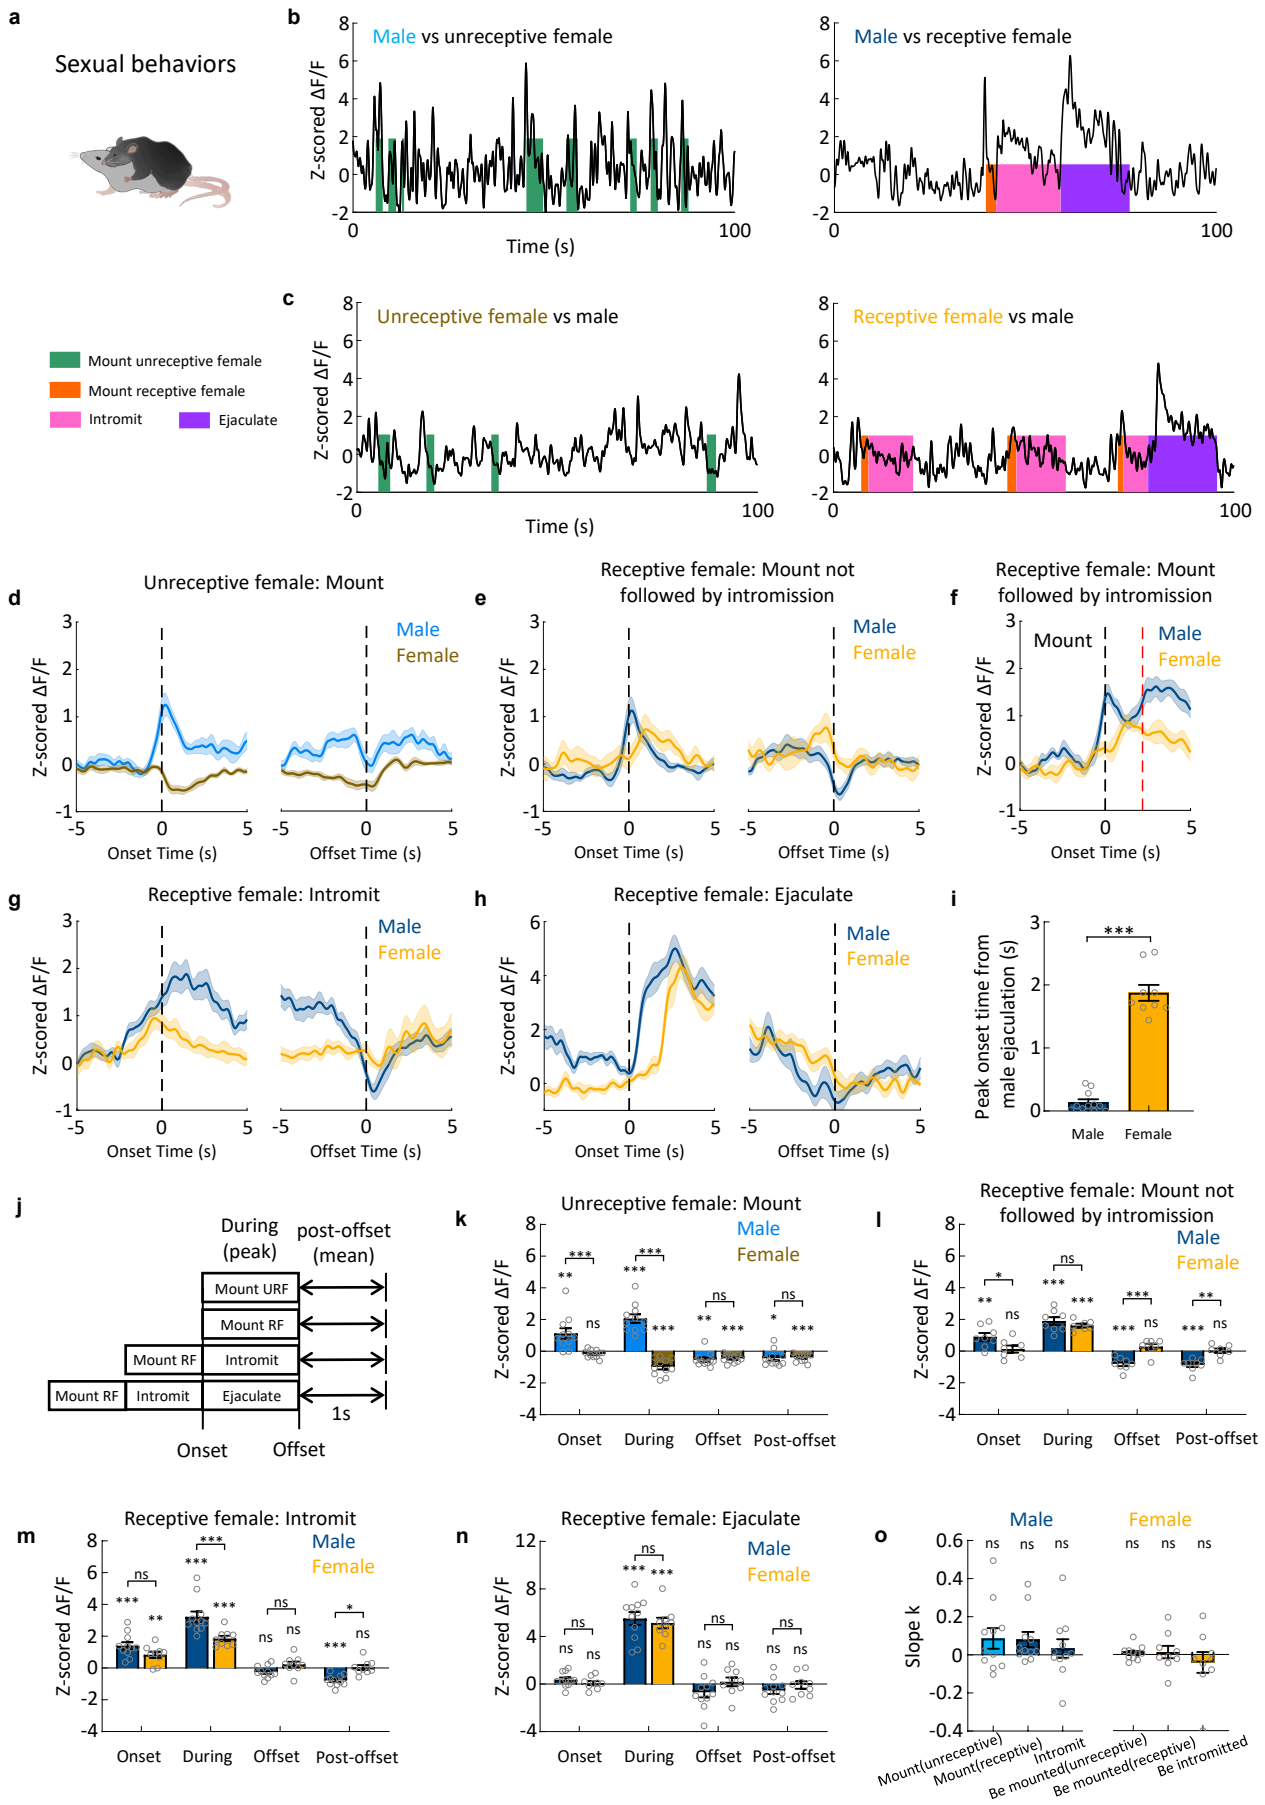

**Figure 4. DA responses during male and female sexual behaviors.**

- a**, A cartoon illustration of mouse mating.
- b-c**, Representative traces of Z scored  $\Delta F/F$  of GRAB<sub>DA2h</sub> during various stages of mating in male and female mice. Similar results were observed from 11 male mice (**b**), 11 unreceptive female mice (**c, left**), and 9 receptive female mice (**c, right**).
- d**, Average post-event histograms aligned to the onset (left) and offset (right) of the male mounting events, when the female mice were unreceptive. Shaded area: s.e.m. (n=11 male mice and n=11 female mice.)
- e-h**, Average post-event histograms aligned to the onset (left) and offset (right) of the indicated mating events, when the female mice were receptive. Shaded area: s.e.m. (n=11 male mice and n=9 female mice.)
- i**, Bar graphs showing the latency from the onset of ejaculation to the moment when DA signals start to increase. Mean  $\pm$  s.e.m overlaid with individual data points for each group. (n=11 male mice and n=9 female mice, Mann-Whitney test, \*\*\*p<0.001)
- j**, Schematics showing the time periods used for characterizing DA responses associated with mating.
- k**, Summary of Z scored GRAB<sub>DA2h</sub> responses at the onset and offset of, during and after male mounting when the females were non-receptive. Mean  $\pm$  s.e.m overlaid with individual data points for each group. (n=11 male mice and n=11 female mice. One sample t test followed by FDR correction to reveal significant responses, \*p<0.05, \*\*p<0.01, \*\*\*p<0.001. Bonferroni's multiple comparisons following two-way ANOVA revealed differences in responses between males and females, \*\*\*p<0.001.)
- l**, Summary of Z scored GRAB<sub>DA2h</sub> responses at the onset and offset of, during and after male mounting that was not followed by intromission. The female mice were receptive. Mean  $\pm$  s.e.m overlaid with individual data points for each group. (n=8 male mice and n=7 female mice. One sample t test followed by FDR correction to reveal significant responses, \*p<0.05, \*\*p<0.01, \*\*\*p<0.001. Bonferroni's multiple comparisons following two-way ANOVA revealed differences in responses between males and females, \*p<0.05, \*\*p<0.01, \*\*\*p<0.001.)
- m**, Summary of Z scored GRAB<sub>DA2h</sub> responses at the onset and offset of, during and after male intromission that was not followed by ejaculation. The female mice were receptive. Mean  $\pm$  s.e.m overlaid with individual data points for each group. (n=11 male mice and n=9 female mice. One sample t test followed by FDR correction to reveal significant responses, \*\*p<0.01, \*\*\*p<0.001. Bonferroni's multiple comparisons following two-way ANOVA revealed differences in responses between males and females, \*p<0.05, \*\*\*p<0.001.)
- n**, Summary of Z scored GRAB<sub>DA2h</sub> responses at the onset and offset of, during and after male ejaculation. Mean  $\pm$  s.e.m overlaid with individual data points for each group. (n=11 male mice and n=9 female mice. One sample t test followed by FDR correction to reveal significant responses, \*\*\*p<0.001. Bonferroni's multiple comparisons following two-way ANOVA revealed no difference in responses between males and females.)
- o**, Summary of slope k of GRAB<sub>DA2h</sub> responses over repeated mating events. Mean  $\pm$  s.e.m overlaid with individual data points for each group. (n=11 male mice, n=11 unreceptive female mice, and n=9 receptive female mice. One sample t test followed by FDR correction revealed no significant adaptation in response magnitude over trials.)

241 At the offset of female attack, dopamine levels returned to baseline (**Figures 5b, 5d and 5f**).  
242 The sex difference in dopamine release during attack was not due to difference in attack  
243 duration: in both males and females, each attack bout lasted approximately 2 seconds (**Figure**  
244 **5g**).

245 Previous microdialysis measurements suggest a sustained elevation of dopamine levels  
246 after male-male confrontation (Beiderbeck et al., 2012; van Erp and Miczek, 2000). We thus  
247 analyzed the accumulated dopamine signal before, during and after the inter-male aggression  
248 and maternal aggression (**Figure 5h-5i**). While dopamine levels were significantly elevated  
249 during initial encounter with the intruder in males, we found no significant difference in  
250 dopamine levels between the pre-intruder and post-intruder periods (**Figure 5h**). To ensure that  
251 our recording method can detect a sustained increase in dopamine, we i. p. injected dopamine  
252 transporter (DAT) inhibitor (GBR12909 20 mg/kg) in a subset of animals. DAT mediates  
253 dopamine reuptake and its blockage is known to cause an elevation of extracellular dopamine  
254 concentration (Westerink et al., 1987). Ten minutes after injecting DAT inhibitor but not saline,  
255 the GRAB<sub>DA2h</sub> signal showed a consistent and sustained upward shift, supporting that our  
256 method was capable of detecting a general increase in dopamine level (**Figure 5 – figure**  
257 **supplement 2**).

258

### 259 **Dopamine responses in NAc during pup-directed behaviors**

260 We also examined the dopamine release during pup-directed behaviors. Pup-directed  
261 behaviors are unique in that they show qualitative differences based on the motivational state of  
262 the animals. Naïve male mice either ignore or attack pups while fathers readily care for the  
263 young (e.g., quickly retrieve a wandering pup back to the nest; (Perrigo et al., 1990)). Virgin  
264 female mice from laboratory stocks typically do not attack pups but many show avoidance  
265 (Mann et al., 1983). With repeated pup exposure, however, virgin females can stop avoiding  
266 pups and care for them, a process known as pup sensitization (Rosenblatt, 1967). Mothers are  
267 strongly motivated for pups. They not only care for pups for most of the day but are willing to  
268 trade other high value rewards for pups (Trezza et al., 2011). Thus, the varying motivation to  
269 pups across different reproductive stage makes pups a particular useful social stimulus for  
270 evaluating the neural representation of motivation.

271 During recording, we introduced 5 - 7 pups, one at time, into the home cage of the  
272 recorded mouse for a total of 10 minutes. Among the 10 recorded naïve males, 5 ignored the



# Figure 5

bioRxiv preprint doi: <https://doi.org/10.1101/2021.06.22.449478>; this version posted June 23, 2021. The copyright holder for this preprint (which was not certified by peer review) is the author/funder. All rights reserved. No reuse allowed without permission.

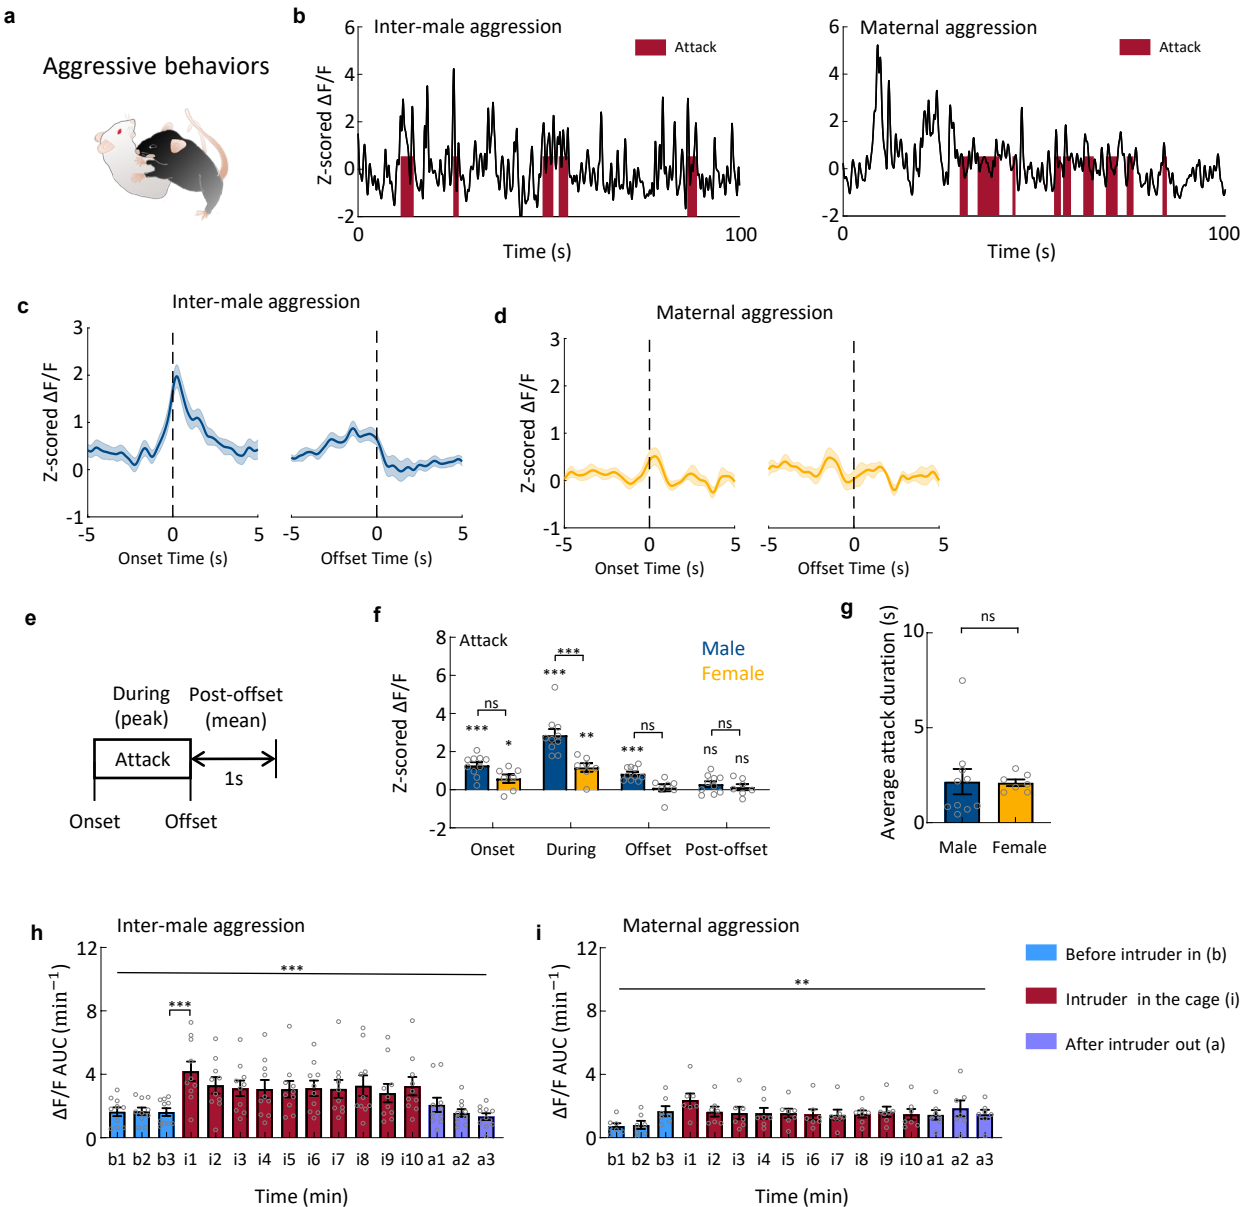

**Figure 5. DA responses during aggressive behaviors.**

**a**, A cartoon illustration of mouse attack.

**b**, Representative traces of Z scored  $\Delta F/F$  of  $GRAB_{DA2h}$  during inter-male aggression and maternal aggression. Similar results were observed from 10 male mice and 7 female mice.

**c-d**, Average post-event histograms aligned to the onset (left) and offset (right) of attack. Shaded area: s.e.m. (n=10 male mice and n=7 female mice.)

**e**, Schematics showing the time periods used for characterizing DA responses related to attack.

**f**, Summary of Z scored  $GRAB_{DA2h}$  responses at the onset and offset of, during and after attack. Mean  $\pm$  s.e.m overlaid with individual data points for each group. (n=10 male mice and n=7 female mice. One sample t test followed by FDR revealed significant responses, \* $p < 0.05$ , \*\* $p < 0.01$ , \*\*\* $p < 0.001$ . Bonferroni's multiple comparisons following two-way ANOVA revealed differences in responses between males and females, \*\*\* $p < 0.001$ .)

**g**, Bar graph showing average attack durations for male and female mice. Mean  $\pm$  s.e.m overlaid with individual data points for each group. (n=10 male mice and n=7 female mice, Mann-Whitney test,  $p = 0.94$ .)

**h**, Accumulated DA signals before, during, and after the male-male interaction. Mean  $\pm$  s.e.m overlaid with individual data points for each group. (n = 11 mice, Friedman test,  $p < 0.001$ . Dunn's multiple comparisons revealed the significant difference between b3 and i1, \*\*\* $p < 0.001$ .)

**i**, Accumulated DA signals before, during, and after the interaction between the lactating female with a female intruder. Mean  $\pm$  s.e.m overlaid with individual data points for each group. (n = 9 mice, Friedman test,  $p = 0.002$ . Dunn's multiple comparisons revealed no difference between b3 and any the other time points.)

273 pups (non-hostile males, NHM) and 5 attacked and killed pups (hostile males, HM). 10 (5 non-  
274 hostile and 5 hostile males) of those males were then paired with a female and became a father  
275 (father males, FM). We then repeated the recording of the test males between postpartum day 2  
276 and 5 of their cohoused females. During recording, all fathers showed paternal behaviors  
277 including pup retrieval.

278         The temporal dynamics of dopamine release during pup approach were similar among  
279 naïve hostile males, naïve non-hostile males, and fathers: dopamine was not elevated at the  
280 onset of approach and increased during approach and reached the maximum level towards the  
281 end of approach (**Figures 6a-6c, 6f and 6h**). However, there was a significant difference in  
282 peak dopamine release during pup approach among the three groups of males. Specifically,  
283 dopamine increase was the highest in fathers and the lowest in hostile males (**Figure 6k**). Upon  
284 reaching the pup, the males closely interacted with the pups, including investigating, licking, and  
285 grooming the pups. As pups were often occluded by the body of the male, we did not attempt to  
286 distinguish these behaviors. During close interaction, dopamine level transiently increased and  
287 then returned to the baseline in all recorded animals and the peak level did not differ among  
288 groups (**Figure 6d, 6g, 6i and 6l**). In hostile males, dopamine level also transiently increased  
289 during infanticide although the peak increase was slightly lower than that during retrieval in  
290 fathers ( $p = 0.05$ , unpaired t test) (**Figures 6e, 6j and 6m-6n**). Interestingly, we noticed a  
291 transient dopamine suppression below the baseline after fathers completed retrieval and  
292 disengaged with the pups (**Figures 6n**).

293         Similarly, we examined dopamine release in NAc core in both naïve and lactating  
294 females (**Figure 7a**). 6/16 virgin females showed pup retrieval (naïve maternal females, NMF,  
295 latency to retrieve:  $254.2 \pm 108.5$  s), while the rest of females only investigated and groomed  
296 the pups (naïve non-maternal females, NNF). All lactating females (10/10, mother females, MF)  
297 showed pup retrieval quickly after pup introduction (Latency to retrieve (mean  $\pm$  STD):  $23.51 \pm$   
298  $20.9$  s). Dopamine release patterns during pup-interaction in females were qualitatively similar  
299 to that in males. Specifically, dopamine increased during pup approach, investigation, and  
300 retrieval (**Figure 7**). The level of increase during pup approach was higher in females that  
301 showed maternal behaviors than those not (**Figure 7k**).

302         Overall, these results suggest that dopamine increased acutely in NAc core during all  
303 phases of social behaviors. Dopamine increase during approach may signal the motivation  
304 towards a social target while dopamine increase during the consummatory social actions may  
305 signal the hedonic value of the behavior.



**Figure 6. DA responses during pup-directed behaviors in naive males and fathers.** All rights reserved. No reuse allowed without permission.

**a**, A cartoon illustration showing an adult male approaches a pup.

**b**, Representative traces of Z scored  $\Delta F/F$  of GRAB<sub>DA2h</sub> during pup-directed behaviors in naive hostile males, naive non-hostile males, and fathers. Similar results were observed for 5 naive hostile male mice, 5 naive non-hostile male mice, and 10 father male mice.

**c-e**, Average post-event histograms aligned to the onset (left) and offset (right) of the indicated pup-directed behaviors for the naive hostile male mice. Shaded area: s.e.m. (n=5 mice.)

**f-g**, Average post-event histograms aligned to the onset (left) and offset (right) of the indicated pup-directed behaviors for the naive non-hostile male mice. Shaded area: s.e.m. (n=5 mice.)

**h-j**, Average post-event histograms aligned to the onset (left) and offset (right) of the indicated pup-directed behaviors for fathers. Shaded area: s.e.m. (n=10 mice.)

**k**, Summary of Z scored GRAB<sub>DA2h</sub> responses at the onset and offset of, and during approach a pup for the naive hostile males, naive non-hostile males, and fathers. Mean  $\pm$  s.e.m overlaid with individual data points for each group. (n=5 for naive hostile male mice, n=5 for naive non-hostile male mice, and n=10 for fathers. One sample t test followed by FDR correction to reveal responses, \*\*p<0.01, \*\*\*p<0.001. Tukey's multiple comparisons following one way ANOVA revealed the differences in responses between groups at the indicated moments, \*p<0.05, \*\*p<0.01, \*\*\*p<0.001.)

**l**, Summary of Z scored GRAB<sub>DA2h</sub> responses at the onset and offset of, during and after close interaction with a pup for the naive hostile male mice, naive non-hostile male mice, and fathers. Mean  $\pm$  s.e.m overlaid with individual data points for each group. (n=5 for naive hostile male mice, n=5 for naive non-hostile male mice, and n=10 for father male mice. One sample t test followed by FDR correction to reveal significant responses, \*p<0.05, \*\*p<0.01, \*\*\*p<0.001. Tukey's multiple comparisons following one-way ANOVA revealed no differences between groups at any moment. \*p<0.05, \*\*p<0.01, \*\*\*p<0.001.)

**m**, Summary of Z scored GRAB<sub>DA2h</sub> responses at the indicated moments of biting for the naive hostile male. Mean  $\pm$  s.e.m overlaid with individual data points for each group. (n=5 male mice, one sample t test followed by FDR correction to reveal significant responses, \*\*\*p<0.001.)

**n**, Summary of Z scored GRAB<sub>DA2h</sub> responses at the indicated moments of retrieval for the fathers. Mean  $\pm$  s.e.m overlaid with individual data points for each group. (n=10 male mice, one sample t test followed by FDR correction to reveal significant responses, \*p<0.05, \*\*p<0.01, \*\*\*p<0.001.)

# Figure 7

bioRxiv preprint doi: <https://doi.org/10.1101/2021.06.22.449478>; this version posted June 23, 2021. The copyright holder for this preprint (which was not certified by peer review) is the author/funder. All rights reserved. No reuse allowed without permission.

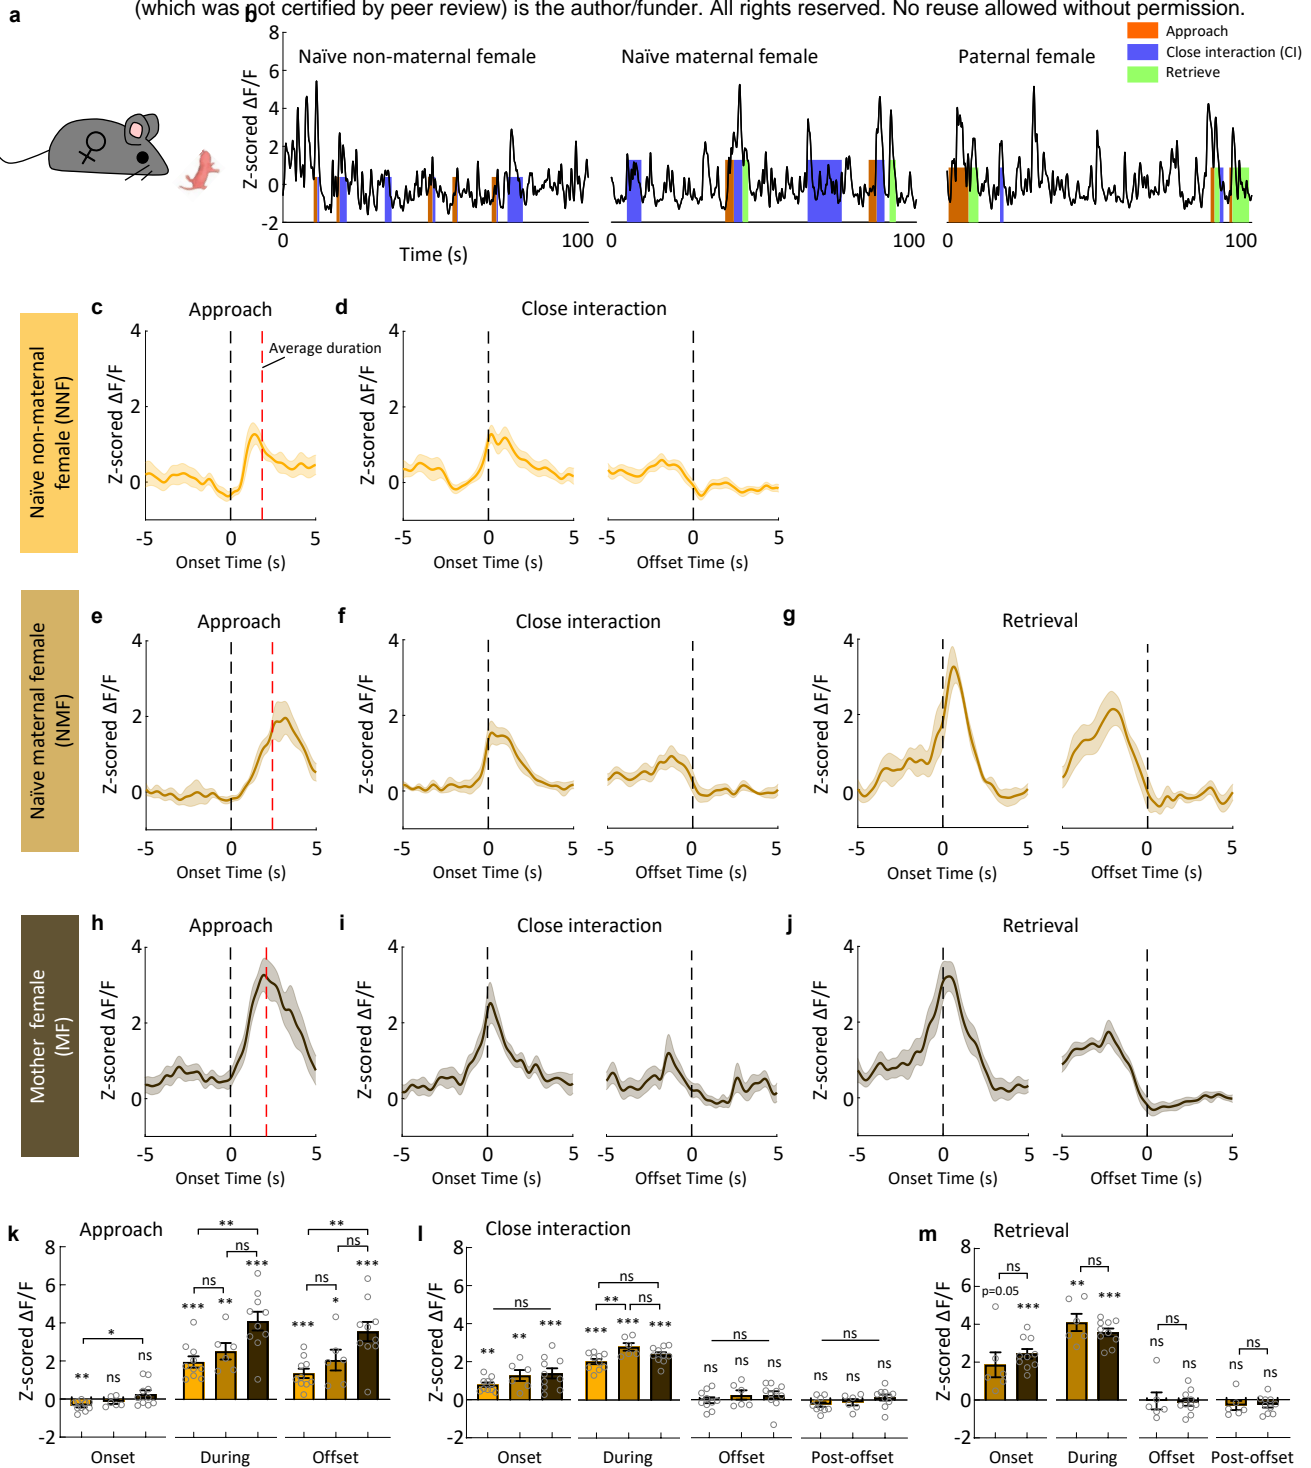

**Figure 7. DA responses during pup-directed behaviors in naive females and mothers.**

- a**, A cartoon illustration showing an adult female approaches a pup.
- b**, Representative traces of Z scored  $\Delta F/F$  of GRAB<sub>DA2h</sub> during pup-directed behaviors in naive non-maternal female, naive maternal female, and paternal female mice. Similar results were observed from 10 naive non-maternal female mice, 6 naive maternal female mice, and 10 mother mice.
- c-d**, Average post-event histograms aligned to the onset (left) and offset (right) of the indicated pup-directed events for the naive non-maternal female mice. Shaded area: s.e.m. (n=10 mice.)
- e-g**, Average post-event histograms aligned to the onset (left) and offset (right) of the indicated pup-directed events for the naive maternal female mice. Shaded area: s.e.m. (n=6 mice.)
- h-j**, Average post-event histograms aligned to the onset (left) and offset (right) of the indicated pup-directed events for mother mice. Shaded area: s.e.m. (n=10 mice.)
- k**, Summary of Z scored GRAB<sub>DA2h</sub> responses at the onset and offset of, and during approach a pup of the naive non-maternal female mice, naive maternal female mice, and paternal female mice. Mean  $\pm$  s.e.m overlaid with individual data points for each group. (n=10 naive non-maternal female mice, n=6 naive maternal female mice, and n=10 mother female mice. One sample t test followed by FDR correction to reveal significant responses, \*p<0.05, \*\*p<0.01, \*\*\*p<0.001. Tukey's multiple comparisons following one-way ANOVA revealed the differences between groups at the indicated moments, \*p<0.05, \*\*p<0.01, \*\*\*p<0.001.)
- l**, Summary of Z scored GRAB<sub>DA2h</sub> responses at the onset and offset of, during and after close interaction with a pup for the naive non-maternal female mice, naive maternal female mice, and paternal female mice. Mean  $\pm$  s.e.m overlaid with individual data points for each group. (n=10 naive non-maternal female mice, n=6 naive maternal female mice, and n=10 mother female mice. One sample t test with FDR correction revealed significant responses, \*p<0.05, \*\*p<0.01, \*\*\*p<0.001. Tukey's multiple comparisons following one-way ANOVA revealed the differences between groups at the indicated moments, \*\*p<0.01.)
- m**, Summary of Z scored GRAB<sub>DA2h</sub> responses at the onset and offset of, during and after retrieving a pup for the naive maternal females and paternal females. Mean  $\pm$  s.e.m overlaid with individual data points for each group. (n=6 naive maternal female mice, and n=10 mother female mice. One sample t test with FDR correction revealed significant responses, \*p<0.05, \*\*p<0.01, \*\*\*p<0.001. Unpaired t tests revealed no differences between groups of mice.)

306

## 307 **Dopamine responses towards aversive experience**

308 Do dopamine levels increase during all social behaviors or only the behaviors with  
309 positive valence? To address this question, we recorded GRAB<sub>DA2h</sub> signal during defeat, a  
310 robust negative social experience. During recording, an aggressive Swiss Webster (SW) male  
311 mouse was introduced into the home cage of the recorded male for 10 minutes. Upon being  
312 attacked, the recording male mouse attempted to escape from the aggressor by flight and  
313 pushing and did not attempt to attack back. After a couple bouts of fighting, the recording male  
314 was clearly defeated: the SW intruder initiated all the attacks and the recorded mice stayed in  
315 corners and showed submissive postures. In contrast to the dopamine increase during attack,  
316 dopamine consistently and transiently decreased during defeat (**Figure 8b-d**). Interestingly, we  
317 noticed a rebound increase of dopamine after the termination of each defeat episode (**Figure**  
318 **8b-d**).

319 To induce defeat in females, we introduced each recording female mouse to the home  
320 cage of a lactating SW female. Similar to that in males, dopamine signal decreased during  
321 defeat and rebounded after each defeat episode (**Figure 8b-d**).

322 We next examined dopamine response during aversive experience that is not socially  
323 relevant. We presented 0.05% TMT, a pungent chemical found in fox feces, on a Q-tip to the  
324 recorded mouse for 10 minutes when the test animal was head-fixed and positioned on a  
325 running wheel (**Figure 8e**); we suspended the test mouse by lifting its tail for 10 seconds to  
326 simulate the situation when it was caught by a predator (**Figure 8i**); we also delivered a series  
327 of 5-second 0.4 mA foot shocks to elicit pain (**Figure 8m**). In all cases, we observed a  
328 consistent decrease in dopamine signal during the aversive experience (**Figures 8e-8p**). For  
329 defeat, tail suspension and TMT exposure, the dopamine typically decreased to its lowest level  
330 within 2s after the onset and then gradually increases despite the ongoing aversive experience  
331 (**Figures 8a-8l**). For foot shock, the dopamine decreased sharply immediately after shock onset  
332 and remained maximally suppressed throughout the shocking period (**Figures 8n-8p**). At the  
333 offset of all aversive experience, dopamine showed a rebound increase (**Figures 8a-p**). While  
334 the decrease in dopamine response during aversive experience was comparable between  
335 males and females, the male showed a higher rebound after all aversive experiences except  
336 foot shock (**Figures 8d, 8h, 8l and 8p**). Neither dopamine decrease during aversive experience

# Figure 8

bioRxiv preprint doi: <https://doi.org/10.1101/2021.06.22.449478>; this version posted June 23, 2021. The copyright holder for this preprint (which was not certified by peer review) is the author/funder. All rights reserved. No reuse allowed without permission.

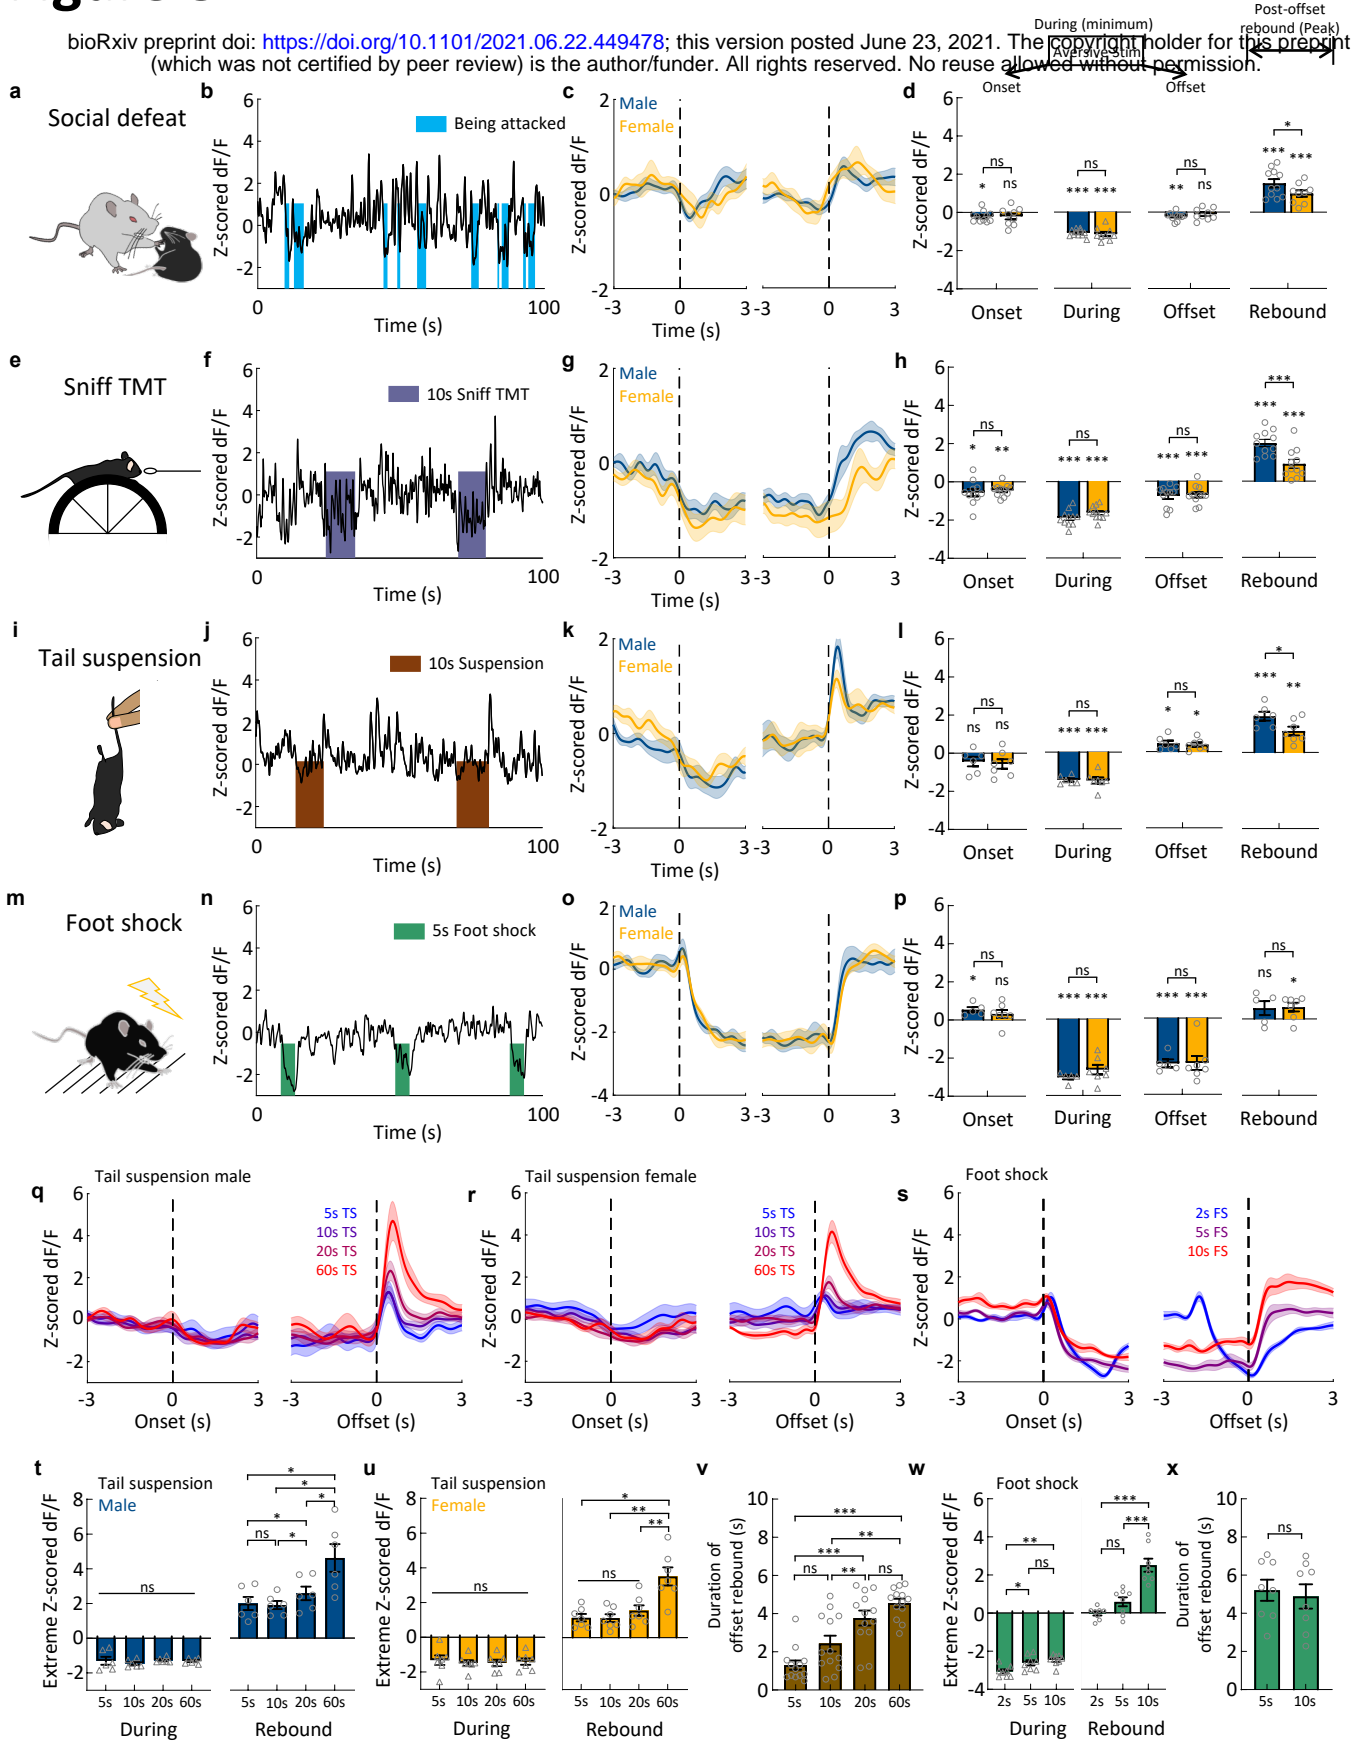



## Figure 8. DA responses during aversive social and non-social experiences.

- a**, A cartoon illustration of social defeat.  
bioRxiv preprint doi: <https://doi.org/10.1101/2021.06.22.449478>; this version posted June 23, 2021. The copyright holder for this preprint (which was not certified by peer review) is the author/funder. All rights reserved. No reuse allowed without permission.
- b**, Representative traces of Z scored  $\Delta F/F$  of GRAB<sub>DA2h</sub> during defeat. Similar results were observed for 11 male mice and 9 female mice.
- c**, Average post-event histograms aligned to the onset (left) and offset (right) of being attacked. Shaded area: s.e.m. (n=11 male mice and n=9 female mice.)
- d**, Top: Schematics showing the time periods used for characterizing DA responses related to aversive experiences. Bottom: Summary of Z scored GRAB<sub>DA2h</sub> responses at the indicated moments of being attacked. Mean  $\pm$  s.e.m overlaid with individual data points for each group. (n=11 male mice and n=9 female mice. One sample t test with FDR correction revealed significant responses, \*p<0.05, \*\*p<0.01, \*\*\*p<0.001. Bonferroni's multiple comparisons following two-way ANOVA revealed the difference in rebound responses between males and females, \*p<0.05.)
- e**, A cartoon illustration of TMT exposure.
- f**, Representative traces of Z scored  $\Delta F/F$  of GRAB<sub>DA2h</sub> during sniffing TMT. Similar results were observed for 11 male mice and 11 female mice.
- g**, Average post-event histograms aligned to the onset (left) and offset (right) of TMT exposure. Shaded area: s.e.m. (n=11 male mice and n=11 female mice.)
- h**, Summary of Z scored GRAB<sub>DA2h</sub> responses at the indicated moments of sniffing TMT. Mean  $\pm$  s.e.m overlaid with individual data points for each group. (n=11 male mice and n=11 female mice. One sample t test with FDR correction revealed significant responses, \*p<0.05, \*\*p<0.01, \*\*\*p<0.001. Bonferroni's multiple comparisons following two-way ANOVA revealed the difference in rebound response between males and females, \*\*\*p<0.001.)
- i**, A cartoon illustration of tail suspension.
- j**, Representative traces of z-scored  $\Delta F/F$  of GRAB<sub>DA2h</sub> during the tail suspension. Similar results were observed from 6 male mice and 7 female mice.
- k**, Average post-event histograms aligned to the onset (left) and offset (right) of tail suspension for the tested male and female mice. Shaded area: s.e.m. (n=6 male mice and n=7 female mice.)
- l** Summary of Z scored GRAB<sub>DA2h</sub> responses at the indicated moments of tail suspension. Mean  $\pm$  s.e.m overlaid with individual data points for each group. (n=6 male mice and n=7 female mice. One sample t test with FDR correction revealed significant responses, \*p<0.05, \*\*p<0.01, \*\*\*p<0.001. Bonferroni's multiple comparisons following two-way ANOVA revealed the difference in rebound response between males and females, \*p<0.05)
- m**, A cartoon illustration of foot shock.
- n**, Representative traces of Z scored  $\Delta F/F$  of GRAB<sub>DA2h</sub> during 5s foot shock. Similar results were observed from 5 male mice and 7 female mice.
- o**, Average post-event histograms aligned to the onset (left) and offset (right) of the 5s foot shock. Shaded area: s.e.m. (n=5 male mice and n=7 female mice.)
- p**, Summary of Z scored GRAB<sub>DA2h</sub> responses at the indicated moments of foot shock. Mean  $\pm$  s.e.m overlaid for each group. (n=5 male mice and n=7 female mice. One sample t test with FDR correction revealed significant responses, \*p<0.05, \*\*\*p<0.001. Bonferroni's multiple comparisons following two-way ANOVA revealed no difference in responses between males and females.)
- q-r**, Average post-event histograms aligned to the onset (left) and offset (right) of the tail suspension with different suspension duration in males (**q**) and females (**r**). Shaded area: s.e.m. (n=6 male mice and n=7 female mice.)
- s**, Average post-event histograms aligned to the onset (left) and offset (right) of the foot shock with different shock durations. Shaded area: s.e.m. (n=5 males and 3 females.)
- t-u**, Maximum GRAB<sub>DA2h</sub> decrease during tail suspension and maximum post-suspension rebound responses at different suspension durations in males (**t**) and females (**u**). Mean  $\pm$  s.e.m overlaid with individual data points for each group. (n=6 male mice: Friedman test for the during period, p=0.43; Tukey's multiple comparisons following one-way ANOVA revealed the differences in rebound responses between groups, \*p<0.05. n=7 female mice: Tukey's multiple comparisons following one-way ANOVA revealed the differences in rebound responses between groups, \*p<0.05, \*\*p<0.01.)
- v**, Post-suspension rebound durations vary with the length of tail suspension. Mean  $\pm$  s.e.m overlaid with individual data points for each group. (n=6 males and 7 females, Tukey's multiple comparisons following one-way ANOVA revealed the differences in offset rebound duration between groups, \*\*p<0.01, \*\*\*p<0.001.)
- w**, Maximum GRAB<sub>DA2h</sub> decrease during foot-shock and maximum post-shock rebound responses at different shock durations. Mean  $\pm$  s.e.m overlaid with individual data points for each group. (n=5 male mice and 3 female mice, Tukey's multiple comparisons following one-way ANOVA revealed the differences in responses between groups, \*p<0.05, \*\*p<0.01, \*\*\*p<0.001.)
- x**, The post-shock rebound duration is similar between 5s and 10s shocks. Mean  $\pm$  s.e.m overlaid with individual data points for each group. (n=5 male mice and 3 female mice, paired t-test, p=0.69.)

337 nor the rebound response after the experience showed any adaptation over repeated trials  
338 **(Figure 8– figure supplement 1)**.

339 The dopamine rebound may represent a rewarding signal related to relief from aversive  
340 experience. We wondered whether the extent of relief (i.e., dopamine rebound), correlates with  
341 the negativity of the experience. We thus varied the duration of tail suspension and foot shock  
342 and asked whether dopamine responses varied with the length of the aversive experience.  
343 While the magnitude of dopamine decrease during tail suspension was similar across all  
344 durations, the rebound increase was significantly higher and lasted longer after 60-s suspension  
345 than that of shorter durations in both males and females **(Figure 8q-8r and 8t-8v)**. Similarly, 10-  
346 s foot shock induced significantly higher dopamine rebound than 5-s shock while 2-s shock  
347 induced no appreciable rebound, supporting the idea that rebound increase was correlated with  
348 the extent of negativity of the experience **(Figure 8s and 8w-8x)**.

349 Lastly, changes in our fluorescence signal could not be accounted by the movement  
350 artifacts. In our control animals expressing GFP, we observed no significant change in  
351 fluorescence during any behaviors **(Figure 8 – figure supplement 2)**.

352

## 353 **Discussion**

354 Using a recently developed genetically encoded dopamine sensor, our study revealed  
355 details of dopamine responses during social behaviors and identified sexual dimorphism in the  
356 response pattern. We found that dopamine increases in all three phases of social behaviors:  
357 approach, investigation and consummation.

358 The dopamine increase during approach likely signals the motivational state of the  
359 animal towards the target. For example, males, not females, show a higher dopamine increase  
360 during approaching opposite-sex than same-sex conspecifics, consistent with the fact that  
361 males prefer females over males in three-chamber social preference test while females show no  
362 preference to either social target (Yao et al., 2017). For another example, mothers and fathers  
363 are known to be highly motivated for pups as shown by their willingness to work hard to gain  
364 access to pups or giving up other high-value rewards for pups (Hauser and Gandelman, 1985;  
365 Lee et al., 2000; Mattson et al., 2001; Wang et al., 2012; Wilsoncroft, 1968). In parents,  
366 dopamine increases in NAc core during pup approach is consistently higher than that in non-  
367 parental animals. This result is in contrast to the previous finding showing that dopamine

368 responses to pups are similar in males with low and high parental motivation (Lei et al., 2017).  
369 This discrepancy is likely due to the low temporal resolution of microdialysis. Although we found  
370 that the response during approach differs in fathers and naïve males, dopamine increase during  
371 investigation is similar. During infanticide, dopamine level also increased. Thus, the difference in  
372 dopamine release during pup approach may be averaged out using microdialysis that has a  
373 temporal resolution of 10-20 minutes.

374 The motivation-dependent release of dopamine during approach is in line with previous  
375 functional studies that demonstrated an indispensable role of dopamine in social approach, or  
376 more broadly speaking, acquiring access to a social target. For example, blocking the dopamine  
377 signaling in the NAc reduces males' willingness to lever press to gain access to a weaker  
378 intruder and attack (Golden et al., 2019a). Increase dopamine release in NAc by activating  
379 inputs from the medial preoptic nucleus to the ventral tegmental area promotes pup and male  
380 approach in female mice (Fang et al., 2018; McHenry et al., 2017) . Importantly, we found that  
381 dopamine rises after the onset of approach in all cases, suggesting that it is not required for  
382 approach initiation but might play a role in invigorating the process.

383 Dopamine also increases during social investigation. This increase is likely driven by the  
384 sensory cues from the conspecific and adapts quickly. Similar increase and fast adaption occur  
385 during investigation of a non-social target. This response pattern may explain why mice are less  
386 interested in familiar conspecific or object than novel ones (Leger et al., 2013; Moy et al., 2004).  
387 A previous study suggested that dopamine neurons in VTA show an increase in Ca<sup>2+</sup> activity as  
388 animals withdraw from a novel object (Gunaydin et al., 2014). Here, we found dopamine  
389 increases occur mainly during object approach and reaches maximum during object  
390 investigation. Although dopamine levels remain elevated above the pre-investigation level at the  
391 offset of object investigation, no acute upward change was observed when the animal retreated  
392 from the object. This difference in response pattern may be due to discrepancies of dopamine  
393 neuron activity and dopamine release at the terminals (Gunaydin et al., 2014).

394 Dopamine consistently and transiently increases during consummatory phase of social  
395 behaviors with little adaption over repeated trials. In general, dopamine rises, reaches peak  
396 levels soon after behavior onset, and gradually drops afterwards. At behavior offset, dopamine  
397 levels have often returned to baseline, suggesting that dopamine signals may be most important  
398 for marking transitions in behaviors instead of their maintenance. The sex dimorphism of  
399 dopamine release is most noticeable during the consummatory phase. During attack, males  
400 show higher dopamine increase than postpartum female mice. While dopamine increases

401 during all phases of sexual behaviors in males, only receptive, not unreceptive, females show  
402 dopamine increase and only when she is initially mounted and soon after male ejaculation. The  
403 sex difference in dopamine release during aggression and sexual behaviors likely stem from the  
404 sex differences in behaviors themselves. Indeed, aggressive behaviors in male and female mice  
405 are triggered by different sensory cues while sexual behaviors differ between sexes in both  
406 sensory triggers and motor execution. Regardless of the cause of sex differences in dopamine  
407 release, this difference in release pattern likely signals different valence of the experience and  
408 reinforces the behavior in a sex specific way. Indeed, while in male mice repeated attacks lead  
409 to an increase in aggression, a phenomenon known as winner effect, female mice have not  
410 been found to show a clear winner effect (Hashikawa et al., 2018).

411           What is the function of dopamine release during the consummatory social behaviors?  
412 One likely role of dopamine is for reward associative learning. Inputs to NAc cells that carry  
413 information regarding the environmental contexts and mating partners could be strengthened by  
414 the dopamine release during consummatory social actions and in turn facilitate approach to the  
415 cues and enhance the chance to be engaged in similar social behaviors in the future (Aragona  
416 et al., 2003; Aragona et al., 2006; Balfour et al., 2004; Gingrich et al., 2000; Meisel et al., 1996).  
417 Beyond reward learning, does dopamine release also play a role in the expression of  
418 consummatory social behaviors? Answer to this question could be behavior-specific. Pup  
419 retrieval, for example, has been shown to be critically dependent on dopamine receptor  
420 activation in the NAc shell (Keer and Stern, 1999; Numan et al., 2005). Blocking D1 receptor  
421 signaling in NAc disrupts pup retrieval whereas D1 receptor agonist in the NAc facilitates the  
422 onset of maternal behavior (Numan et al., 2005; Stolzenberg et al., 2007). Inhibiting D1R  
423 expressing cells in NAc reduced attack duration in male mice (Golden et al., 2019b). In contrast,  
424 male sexual behaviors are not affected by dopamine depletion in the NAc although manipulated  
425 males showed a decrease in noncontact erection, suggesting a decrease in sexual motivation  
426 (Liu et al., 1998; Moses et al., 1995). The differential importance of dopamine signaling in the  
427 expression of various social behaviors suggests distinct roles for the NAc in driving these  
428 behaviors. Indeed, NAc has been suggested as a key part of the maternal circuit but largely left  
429 out of consummatory sexual behavior circuits (Jennings and de Lecea, 2020; Kohl et al., 2017;  
430 Numan, 2007). Of note, deficits in social reward conditioning are mainly caused by D2 receptor  
431 antagonists in the NAc while deficits in social behavior expression mainly resulted from D1  
432 receptor antagonism (Aragona et al., 2006; Gingrich et al., 2000; Golden et al., 2019b; Meisel et  
433 al., 1996; Numan et al., 2005). Thus, it is possible that dopamine release in the NAc serves dual

434 roles: it promotes the execution of certain social behaviors through D1R and facilitates reward  
435 conditioning through D2R.

436 Previous microdialysis study showed an overall increase in dopamine during defeat  
437 (Tidey and Miczek, 1996). Here, using a method with finer temporal resolution, we observed a  
438 decrease in extracellular dopamine during defeat followed by rebound increase after the defeat  
439 terminates. Indeed, dopamine rebound is commonly observed at the termination of an aversive  
440 experience regardless of its exact nature and the magnitude of rebound is positively correlated  
441 with the duration of the experience. This suppression-rebound response pattern is in line with  
442 previous electrophysiological recordings in the VTA and FSCV recording in the NAc (Brischoux  
443 et al., 2009; Budygin et al., 2012). Behavioral experiments also demonstrated that relief from the  
444 pain can be used as a “reward” to induce preference to the associated context or sensory cues  
445 (Navratilova et al., 2015). We speculate the dopamine rebound at the end of defeat could  
446 contribute to the rapid emergence of avoidant behavior towards the aggressor after a short  
447 period of defeat as the rebound often occurs when the defeated animal moves away from the  
448 aggressor. Interestingly, we did not observe a rebound increase at the termination of forced  
449 mounting in non-receptive females and females do not develop avoidance towards the male  
450 afterwards. In addition to the rebound increase after aversive experience, we also noticed a  
451 transient suppression in dopamine activity after the termination of positive social behavior, such  
452 as mounting and intromission in males and pup retrieval in fathers. The biphasic activity change  
453 at the onset and offset of an experience may together facilitate learning of cues predictive of the  
454 transition of behaviors.

455 In short, our study demonstrated fast and dynamic dopamine responses in the NAc  
456 during various phases of social behaviors. The functional role of dopamine is likely to be  
457 complex, multifaceted and across both fast and slow time scales. Future studies with temporally  
458 precise manipulation tools that can block and enhance the dopamine release in a behavior-  
459 locked manner will facilitate our understanding of the mesolimbic dopamine function in social  
460 behaviors.

461

## 462 **Material and Methods**

### 463 **Animals**

464 All procedures were approved by the IACUC of NYULH in compliance with the NIH guidelines  
465 for the care and use of laboratory animals. Mice were housed at 18–23 °C with 40–60%

466 humidity under a 12 h light–dark cycle (dark cycle, 10 p.m. to 10 a.m.), with food and water  
467 available ad libitum. Test animals were adult *Drd1-cre* (> 8 weeks, MMRRC\_030989-UCD). *Ai9*  
468 mice (Jackson stock no.007909) were crossed with *Drd1-cre* mice for revealing D1R  
469 expression. Stimulus animals were adult C57BL/6N male and female mice, adult BALB/c male  
470 and female mice, or sexually experienced C57BL/6N and Swiss Webster males (aggressor)  
471 purchased from Charles River, and 3-7 days old pups were bred from test mice or wildtype  
472 C57BL/6N breeders. After surgery, all the animals are single housed. All experiments were  
473 performed during the dark cycle of the animals.

474

### 475 **Immunofluorescence**

476 For histological analysis, animals were deeply anesthetized and transcardially perfused with 20  
477 mL of PBS, followed by 20 mL of 4% paraformaldehyde (Electron Microscopy Sciences, cat. no.  
478 15714) in PBS. After perfusion, brains were harvested, post-fixed in 4% paraformaldehyde for  
479 4h at 4 °C and cryoprotected in 20% (w/v) sucrose for 24h. The brains were then embedded in  
480 an O.C.T compound (Fisher Healthcare, cat. no. 23730571) and sectioned into 60- $\mu$ m-thick  
481 slices using a CM1900 cryostat (Leica).  $GRAB_{DA2h}$  was immunostained using a chicken anti-  
482 GFP antibody (1:1,000, Abcam, cat. no. ab13970) followed by an Alexa 488-conjugated donkey  
483 anti-chicken secondary antibody (1:1,000, Jackson ImmunoResearch, cat. no. 116967). DAPI  
484 (1:20,000; Thermo Fisher, cat. no. D1306) was used with the secondary antibody to visualize  
485 the nucleus. The  $GRAB_{DA2h}$  fluorescence images were acquired with a virtual slide microscope  
486 (Olympus, VS120) in 10x mode or a confocal microscope (Zeiss LSM 510 or 700 microscope)  
487 for the high-resolution image in 40x mode.

488

### 489 **Fiber photometry**

490 The male mice were screened for aggression before the surgery. For the test mouse  
491 with a single fiber implanted, 80 nL AAV9.hSyn.DIO.  $GRAB_{DA2h}$  (Vigene Biosciences, titer:  
492  $4.97e+13$  gc/ml) was injected into one side of NAc core (anterior-posterior (AP): +0.98 mm  
493 relative to Bregma; medial-lateral (ML):  $\pm 1.2$ mm relative to Bregma; dorsal-ventral (DV): 4.2 mm  
494 from brain surface) using a nanoinjector (World Precision Instruments, Nanoliter 2000). For  
495 bilateral recording, AAV9.hSyn.DIO.  $GRAB_{DA2h}$  (Vigene Biosciences) was injected into one side  
496 and AAV9.hSyn.DIO.  $GRAB_{DA2h}$  or AAV9.hSyn.loxP.  $GRAB_{DA2h}.loxP$  (Vigene Biosciences, titer:  
497  $1.43e+13$  gc/ml) was injected into the contralateral side of NAc core for the D1-D1 mice or D1-  
498 nonD1 mice respectively. Control mice were injected with AAV2.CAG.Flex.GFP (UNC, titer:

499 4.00e+12 gc/ml) bilaterally. After virus injection, a custom-made optic fiber assembly (Thorlabs,  
500 FT400EMT and SFLC440-10) was implanted approximately 300  $\mu\text{m}$  above each injection site.  
501 Fiber photometry recording was performed two weeks after AAV injection. The setup used for  
502 recording was constructed as described previously (Falkner et al., 2016). In brief, a 400-Hz 472-  
503 nm bandpass (passing band:  $472 \pm 15$  nm, FF02-472/30-25, Semrock) filtered light-emitting  
504 diode (Thorlabs, LED light: M470F1; LED driver: LEDD1B) was used to excite GRAB<sub>DA2h</sub> or  
505 GFP. The emission light collected from the recording site was bandpass filtered (passing bands:  
506  $535 \pm 25$  nm, FF01-535/505, Semrock), detected by a Femtowatt Silicon Photoreceiver  
507 (Newport, 2151), and recorded using a real-time processor (RZ5, TDT). The 400-Hz signals  
508 carrying fluorescence intensity of GRAB<sub>DA2h</sub> or GFP were extracted in real time using a custom  
509 TDT program. To analyze the recording data, the MATLAB function “msbackadj” with a moving  
510 window of 25% of the total recording duration was first applied to obtain the instantaneous  
511 baseline signal. The instantaneous  $\Delta F/F$  was calculated as  $(F_{\text{raw}} - F_{\text{baseline}})/F_{\text{baseline}}$ . The Z scored  
512  $\Delta F/F$  of the entire recording session was calculated as  $(\Delta F/F - \text{mean}(\Delta F/F))/\text{std}(\Delta F/F)$ . The  
513 peri-event histogram (PETH) of a given behavior was plotted by aligning the Z scored  $\Delta F/F$   
514 signal to the onset or offset of the behavior. The response during each behavior episode is  
515 defined as the maximum Z during the behavior if the average Z increases during the behavior  
516 and the minimum Z if average Z decreases during the behavior. The onset and offset response  
517 are determined as the Z values at the moment of behavior onset and offset. The post-offset  
518 response is defined as the average Z between 0-1 second after the end of the behavior. The  
519 post-offset rebound response is the maximum Z 0-2 seconds after the termination of aversive  
520 experience. The velocity of the animal was calculated as the displacement of the body location  
521 of the animal between every other frame, and the acceleration was calculated as the velocity  
522 difference between two adjacent frames. The onset of the movement is defined as the  
523 movement following at least 2s immobility (velocity < 2 cm/s) and reaches a velocity of minimally  
524 15 cm/s for at least 1.5 s. The correlation coefficient was calculated using MATLAB function  
525 ‘corrcoef’.

526

## 527 **Behavioral paradigm and analysis**

528 Animal behaviors in all experiments were video recorded from both the side and top of  
529 the cage using two synchronized cameras (Basler, acA640-100 gm) and a commercial video  
530 acquisition software (StreamPix 8, Norpix) in a semi-dark room with infrared illumination at a  
531 frame rate of 25 frames/s. Manual behavioral annotation was performed on a frame-by-frame

532 basis using custom software written in MATLAB (<https://pdollar.github.io/toolbox/>). DeepLabCut  
533 was used for animal tracking (Mathis et al., 2018)

534 *Social interaction between animals of the same sex:* An adult BALB/c male was  
535 introduced to the home cage of the test male mouse, or an adult BALB/c female was introduced  
536 to the home cage of the test female mouse. If the test female is lactating, pups were removed  
537 10 minutes prior to the intruder introduction. During social encounters, we identified three  
538 behaviors of the test mice -- approach, investigation and attack. "Approach" was defined as  
539 continuous movement toward a stationary intruder mouse until the center mass of the two  
540 animals are below 100 pixels. "Investigation" was defined as close contact to any part of the  
541 intruder's body. "Attack" was defined as a suite of intense actions aiming at biting the intruders,  
542 including pushes, lunges, bites, tumbling, and fast locomotion episodes between such  
543 movements.

544 *Social interaction between animals of different sexes:* An adult receptive or unreceptive  
545 female intruder mouse was introduced into the home cage of the test male mouse. For the test  
546 female mouse, an adult sexually experienced male mouse was introduced into the female's  
547 home cage. During social encounters, we annotated "approach" and "investigation" of the test  
548 mouse, and "mount", "intromit" and "ejaculate" of the male mouse. "Mount" is when the male  
549 grasped and mounted the female's flanks. "Intromit" includes both rapid thrust against the  
550 female's rear and deep rhythmic thrust. "Ejaculate" starts when the male suddenly ceases all  
551 thrusting movements but still holding onto the female's flank and then after a few seconds  
552 slumps to the side of the female. "Ejaculate" ends when the male resumes movements.

553 *Food Intake* A cup of peanut butter (around 2 grams, Jif Creamy Peanut Butter) was  
554 introduced into the home cage of the test mouse. The test mouse freely interacted with the  
555 peanut butter for 10 minutes. During the interaction, we identified "approach" and "eat".  
556 "Approach" is defined as continuous movement toward the peanut butter cup until the mouse  
557 head is above the cup. "Eat" is defined as active licking and chewing peanut butter.

558 *Pup-related behaviors:* 5 -7 pups from test mice or C57BL/6N breeders were  
559 introduced, one at a time, into the home cage of the test mouse for a total of 10 minutes.  
560 Approach, close interaction, biting, and retrieval are annotated. "Approach" is defined as  
561 continuous movement toward a pup until the head of the test mouse is above the pup. "Close  
562 interaction" is defined as close contact with pups including sniffing, licking, and grooming.  
563 "Biting" is when the test mouse holds and bites the pup and causes harm. "Retrieval" starts  
564 when the mouse picks up a pup with its mouth and ends when it drops the pup into or around  
565 the nest.



566           *Social defeat*: To induce defeat, the male test mouse was introduced into a Swiss  
567 Webster male's (aggressor) cage for 10-15 minutes. The female test mouse was introduced into  
568 a lactating Swiss Webster female's cage. During interaction with the aggressor, we annotated  
569 "being attacked" of test mice, which is defined as when the aggressor attacks the test mouse.  
570 No other behavior tests were performed after social defeat for at least 24 hours.

571           *Footshock*: The test mouse was placed in a fear conditioning chamber (Med  
572 Associates). After 5 minutes habituation, a series of electric shocks were delivered through the  
573 floor grids (2-s shock: 0.4 mA for 2 s, 40 s interval, 6 times; 5-s shock: 0.4 mA for 5 s, 60 s  
574 interval, 4 times; 10-s shock: 0.4 mA for 10 s, 90 s interval, 4 times). The shock was controlled  
575 by TTL pulses generated using a real-time processor (RZ5, TDT). No other behavior tests were  
576 performed after footshock for at least 24 hours.

577           *TMT exposure*: The test mouse was habituated on a 3D printed head-fixed apparatus 10  
578 minutes a day for 3 days. On the test day, 0.05% TMT (diluted in mineral oil) was delivered to  
579 the head-fixed mouse on a Q-tip moving along a linear track for 6 times. Each TMT  
580 representation lasted for 10 s with a 120-s between trials. The onset of TMT exposure was  
581 defined as when the Q-tip reached the closest point (< 1cm) to the mouse nostrils. The offset  
582 was defined as when the Q-tip started to retract. No other behavior tests were performed after  
583 TMT exposure for at least 24 hours.

584           *Tail suspension*: During the test, the experimenter grabbed the tail of the mouse and  
585 lifted it approximately 25 cm above the floor of the mouse cage. 5-s tail suspension was first  
586 performed for 6 times with 120-s between trials. Then, 10-s, 20-s, 60-s tail suspension trials  
587 were performed with 180 s between trials. No other behavior tests were performed after tail  
588 suspension for at least 24 hours.

589

## 590 **Drug Injection**

591           The test mouse was habituated for head fixation for 3 continuous days. On the test day,  
592 the mouse was head-fixed while DA signals is continuously monitored. After 10 minutes  
593 baseline, we intraperitoneally injected 0.9% NaCl (10ml/kg, Hanna Pharmaceutical Supply, cat.  
594 no. NC9054335) and 40 minutes later, 20 mg/kg GBR 12909 (Tocris, cat. no. 0421) was  
595 injected and the signal was recorded for at least 30 minutes after injection.

596

## 597 **Statistics**

598 All the data were tested for normality first by using Kolmogorov-Smirnov test. If all the  
599 data was normally distributed, paired t tests were performed for comparisons between two  
600 groups within the animal, unpaired t tests between animals, one-way ANOVA with Turkey's post  
601 hoc test, or ordinary (or mixed effect) two-way ANOVA with Bonferroni's multiple-comparison  
602 post hoc test were performed for comparisons between groups. In addition, one sample t-test  
603 was performed to determine whether the Z score is significantly different from 0, followed by  
604 false discovery rate correction with a false discovery rate of 0.05. If one or more groups were  
605 not normally distributed, Mann-Whitney test, Wilcoxon matched-pairs signed-rank test, the  
606 Friedman test with Dunn's multiple-comparison post hoc test, or repeated-measures two-way  
607 ANOVA with Bonferroni's multiple-comparison test were performed. Wilcoxon rank test was  
608 used to compare the means of two groups or the mean of a single group with 0, followed by  
609 false discovery rate correction with a false discovery rate of 0.05. Details of each statistical test  
610 can be found in the **supplementary table 1**. All error bars or error shades represent  $\pm$  SEM. \*, p  
611 < 0.05; \*\*, p < 0.01; \*\*\*, p < 0.001.

612

613 **Acknowledgements:** We thank Dr. Nic Tritsch for feedbacks on the manuscript, Yiwen Jia for  
614 helping with genotyping, Yijing Gao for initial testing of dopamine sensors and Jiawen Fan for  
615 assisting with behavior annotation.

616 **Competing Interests:** The authors declare no competing interests.

## 617 **References**

- 618 Afonso, V.M., Grella, S.L., Chatterjee, D., and Fleming, A.S. (2008). Previous maternal experience affects  
619 accumbal dopaminergic responses to pup-stimuli. *Brain Res* *1198*, 115-123.
- 620 Afonso, V.M., King, S., Chatterjee, D., and Fleming, A.S. (2009). Hormones that increase maternal  
621 responsiveness affect accumbal dopaminergic responses to pup-and food-stimuli in the female rat.  
622 *Hormones and Behavior* *56*, 11-23.
- 623 Afonso, V.M., Shams, W.M., Jin, D., and Fleming, A.S. (2013). Distal pup cues evoke dopamine responses  
624 in hormonally primed rats in the absence of pup experience or ongoing maternal behavior. *J Neurosci*  
625 *33*, 2305-2312.
- 626 Aleyasin, H., Flanigan, M.E., Golden, S.A., Takahashi, A., Menard, C., Pfau, M.L., Multer, J., Pina, J.,  
627 McCabe, K.A., Bhatti, N., *et al.* (2018). Cell-Type-Specific Role of DeltaFosB in Nucleus Accumbens In  
628 Modulating Intermale Aggression. *J Neurosci* *38*, 5913-5924.
- 629 Aragona, B.J., Liu, Y., Curtis, J.T., Stephan, F.K., and Wang, Z. (2003). A critical role for nucleus  
630 accumbens dopamine in partner-preference formation in male prairie voles. *J Neurosci* *23*, 3483-3490.
- 631 Aragona, B.J., Liu, Y., Yu, Y.J., Curtis, J.T., Detwiler, J.M., Insel, T.R., and Wang, Z. (2006). Nucleus  
632 accumbens dopamine differentially mediates the formation and maintenance of monogamous pair  
633 bonds. *Nat Neurosci* *9*, 133-139.
- 634 Balfour, M.E., Yu, L., and Coolen, L.M. (2004). Sexual behavior and sex-associated environmental cues  
635 activate the mesolimbic system in male rats. *Neuropsychopharmacology* *29*, 718-730.
- 636 Bayer, H.M., and Glimcher, P.W. (2005). Midbrain dopamine neurons encode a quantitative reward  
637 prediction error signal. *Neuron* *47*, 129-141.
- 638 Becker, J.B., Rudick, C.N., and Jenkins, W.J. (2001). The role of dopamine in the nucleus accumbens and  
639 striatum during sexual behavior in the female rat. *J Neurosci* *21*, 3236-3241.
- 640 Beiderbeck, D.I., Reber, S.O., Havasi, A., Bredewold, R., Veenema, A.H., and Neumann, I.D. (2012). High  
641 and abnormal forms of aggression in rats with extremes in trait anxiety--involvement of the dopamine  
642 system in the nucleus accumbens. *Psychoneuroendocrinology* *37*, 1969-1980.
- 643 Brischoux, F., Chakraborty, S., Brierley, D.I., and Ungless, M.A. (2009). Phasic excitation of dopamine  
644 neurons in ventral VTA by noxious stimuli. *Proc Natl Acad Sci U S A* *106*, 4894-4899.
- 645 Budygin, E.A., Park, J., Bass, C.E., Grinevich, V.P., Bonin, K.D., and Wightman, R.M. (2012). Aversive  
646 stimulus differentially triggers subsecond dopamine release in reward regions. *Neuroscience* *201*, 331-  
647 337.
- 648 Champagne, F.A., Chretien, P., Stevenson, C.W., Zhang, T.Y., Gratton, A., and Meaney, M.J. (2004).  
649 Variations in nucleus accumbens dopamine associated with individual differences in maternal behavior  
650 in the rat. *J Neurosci* *24*, 4113-4123.
- 651 Damsma, G., Pfau, J.G., Wenkstern, D., Phillips, A.G., and Fibiger, H.C. (1992). Sexual behavior increases  
652 dopamine transmission in the nucleus accumbens and striatum of male rats: comparison with novelty  
653 and locomotion. *Behav Neurosci* *106*, 181-191.
- 654 de Jong, J.W., Afjei, S.A., Pollak Dorocic, I., Peck, J.R., Liu, C., Kim, C.K., Tian, L., Deisseroth, K., and  
655 Lammel, S. (2019). A Neural Circuit Mechanism for Encoding Aversive Stimuli in the Mesolimbic  
656 Dopamine System. *Neuron* *101*, 133-151 e137.
- 657 Eshel, N., Tian, J., Bukwich, M., and Uchida, N. (2016). Dopamine neurons share common response  
658 function for reward prediction error. *Nat Neurosci* *19*, 479-486.
- 659 Falkner, A.L., Grosenick, L., Davidson, T.J., Deisseroth, K., and Lin, D. (2016). Hypothalamic control of  
660 male aggression-seeking behavior. *Nature neuroscience* *19*, 596.
- 661 Fang, Y.Y., Yamaguchi, T., Song, S.C., Tritsch, N.X., and Lin, D. (2018). A Hypothalamic Midbrain Pathway  
662 Essential for Driving Maternal Behaviors. *Neuron* *98*, 192-207 e110.

663 Ferrari, P., Palanza, P., and Parmigiani, S. (2000). Does fear modulate defensive and offensive types of  
664 maternal attack in mice? *Aggressive Behavior* 26, 193-203.

665 Fish, E.W., DeBold, J.F., and Miczek, K.A. (2005). Escalated aggression as a reward: corticosterone and  
666 GABA A receptor positive modulators in mice. *Psychopharmacology* 182, 116-127.

667 Fish, E.W., Joseph, F., and Miczek, K.A. (2002). Aggressive behavior as a reinforcer in mice: activation by  
668 allopregnanolone. *Psychopharmacology* 163, 459-466.

669 Fish, E.W., McKenzie-Quirk, S.D., Bannai, M., and Miczek, K.A. (2008). 5-HT(1B) receptor inhibition of  
670 alcohol-heightened aggression in mice: comparison to drinking and running. *Psychopharmacology (Berl)*  
671 197, 145-156.

672 Flannelly, K.J., and Flannelly, L. (1985). Opponents' size influences maternal aggression. *Psychological*  
673 *reports* 57, 883-886.

674 Fumero, B., Fernandez-Vera, J.R., Gonzalez-Mora, J.L., and Mas, M. (1994). Changes in monoamine  
675 turnover in forebrain areas associated with masculine sexual behavior: a microdialysis study. *Brain Res*  
676 662, 233-239.

677 Gingrich, B., Liu, Y., Cascio, C., Wang, Z., and Insel, T.R. (2000). Dopamine D2 receptors in the nucleus  
678 accumbens are important for social attachment in female prairie voles (*Microtus ochrogaster*). *Behav*  
679 *Neurosci* 114, 173-183.

680 Golden, S.A., Heins, C., Venniro, M., Caprioli, D., Zhang, M., Epstein, D.H., and Shaham, Y. (2017).  
681 Compulsive Addiction-like Aggressive Behavior in Mice. *Biol Psychiatry* 82, 239-248.

682 Golden, S.A., Heshmati, M., Flanigan, M., Christoffel, D.J., Guise, K., Pfau, M.L., Aleyasin, H., Menard, C.,  
683 Zhang, H., and Hodes, G.E. (2016). Basal forebrain projections to the lateral habenula modulate  
684 aggression reward. *Nature* 534, 688.

685 Golden, S.A., Jin, M., Heins, C., Venniro, M., Michaelides, M., and Shaham, Y. (2019a). Nucleus  
686 Accumbens Drd1-Expressing Neurons Control Aggression Self-Administration and Aggression Seeking in  
687 Mice. *The Journal of Neuroscience* 39, 2482-2496.

688 Golden, S.A., Jin, M., Heins, C., Venniro, M., Michaelides, M., and Shaham, Y. (2019b). Nucleus  
689 Accumbens Drd1-Expressing Neurons Control Aggression Self-Administration and Aggression Seeking in  
690 Mice. *J Neurosci* 39, 2482-2496.

691 Golden, S.A., Jin, M., and Shaham, Y. (2019c). Animal Models of (or for) Aggression Reward, Addiction,  
692 and Relapse: Behavior and Circuits. *J Neurosci* 39, 3996-4008.

693 Gunaydin, L.A., Grosenick, L., Finkelstein, J.C., Kauvar, I.V., Fenno, L.E., Adhikari, A., Lammel, S.,  
694 Mirzabekov, J.J., Airan, R.D., Zalocusky, K.A., *et al.* (2014). Natural neural projection dynamics underlying  
695 social behavior. *Cell* 157, 1535-1551.

696 Hamid, A.A., Pettibone, J.R., Mabrouk, O.S., Hetrick, V.L., Schmidt, R., Vander Weele, C.M., Kennedy,  
697 R.T., Aragona, B.J., and Berke, J.D. (2016). Mesolimbic dopamine signals the value of work. *Nat Neurosci*  
698 19, 117-126.

699 Hansen, S., Bergvall, A.H., and Nyiredi, S. (1993). Interaction with pups enhances dopamine release in  
700 the ventral striatum of maternal rats: a microdialysis study. *Pharmacol Biochem Behav* 45, 673-676.

701 Hashikawa, K., Hashikawa, Y., Lischinsky, J., and Lin, D. (2018). The Neural Mechanisms of Sexually  
702 Dimorphic Aggressive Behaviors. *Trends Genet* 34, 755-776.

703 Hauser, H., and Gandelman, R. (1985). Lever pressing for pups: evidence for hormonal influence upon  
704 maternal behavior of mice. *Horm Behav* 19, 454-468.

705 Jenkins, W.J., and Becker, J.B. (2003). Dynamic increases in dopamine during paced copulation in the  
706 female rat. *Eur J Neurosci* 18, 1997-2001.

707 Jennings, K.J., and de Lecea, L. (2020). Neural and Hormonal Control of Sexual Behavior. *Endocrinology*  
708 161.

709 Keer, S.E., and Stern, J.M. (1999). Dopamine receptor blockade in the nucleus accumbens inhibits  
710 maternal retrieval and licking, but enhances nursing behavior in lactating rats. *Physiol Behav* 67, 659-  
711 669.

712 Kippin, T.E., and Pfaus, J.G. (2001). The development of olfactory conditioned ejaculatory preferences in  
713 the male rat. I. Nature of the unconditioned stimulus. *Physiol Behav* 73, 457-469.

714 Kohl, J., Autry, A.E., and Dulac, C. (2017). The neurobiology of parenting: A neural circuit perspective.  
715 *Bioessays* 39, 1-11.

716 Kohlert, J.G., and Meisel, R.L. (1999). Sexual experience sensitizes mating-related nucleus accumbens  
717 dopamine responses of female Syrian hamsters. *Behav Brain Res* 99, 45-52.

718 Lavi-Avnon, Y., Weller, A., Finberg, J.P., Gispán-Herman, I., Kinor, N., Stern, Y., Schroeder, M., Gelber, V.,  
719 Bergman, S.Y., Overstreet, D.H., *et al.* (2008). The reward system and maternal behavior in an animal  
720 model of depression: a microdialysis study. *Psychopharmacology (Berl)* 196, 281-291.

721 Lee, A., Clancy, S., and Fleming, A.S. (2000). Mother rats bar-press for pups: effects of lesions of the  
722 mpoa and limbic sites on maternal behavior and operant responding for pup-reinforcement. *Behav Brain*  
723 *Res* 108, 215-231.

724 Leger, M., Quiedeville, A., Bouet, V., Haelewyn, B., Boulouard, M., Schumann-Bard, P., and Freret, T.  
725 (2013). Object recognition test in mice. *Nat Protoc* 8, 2531-2537.

726 Lei, K., Liu, Y., Smith, A.S., Lonstein, J.S., and Wang, Z. (2017). Effects of pair bonding on parental  
727 behavior and dopamine activity in the nucleus accumbens in male prairie voles. *Eur J Neurosci* 46, 2276-  
728 2284.

729 Liu, C., Kershberg, L., Wang, J., Schneeberger, S., and Kaeser, P.S. (2018). Dopamine secretion is  
730 mediated by sparse active zone-like release sites. *Cell* 172, 706-718. e715.

731 Liu, Y.C., Sachs, B.D., and Salamone, J.D. (1998). Sexual behavior in male rats after radiofrequency or  
732 dopamine-depleting lesions in nucleus accumbens. *Pharmacol Biochem Behav* 60, 585-592.

733 Mann, M.A., Kinsley, C., Broida, J., and Svare, B. (1983). Infanticide exhibited by female mice: genetic,  
734 developmental and hormonal influences. *J Physiology behavior Research Methods* 30, 697-702.

735 Martinez, M., Guillen-Salazar, F., Salvador, A., and Simon, V.M. (1995). Successful intermale aggression  
736 and conditioned place preference in mice. *Physiol Behav* 58, 323-328.

737 Mathis, A., Mamidanna, P., Cury, K.M., Abe, T., Murthy, V.N., Mathis, M.W., and Bethge, M. (2018).  
738 DeepLabCut: markerless pose estimation of user-defined body parts with deep learning. *Nat Neurosci*  
739 *21*, 1281-1289.

740 Mattson, B.J., Williams, S., Rosenblatt, J.S., and Morrell, J.I. (2001). Comparison of two positive  
741 reinforcing stimuli: pups and cocaine throughout the postpartum period. *Behav Neurosci* 115, 683-694.

742 May, M.E., and Kennedy, C.H. (2009). Aggression as positive reinforcement in mice under various ratio-  
743 and time-based reinforcement schedules. *Journal of the experimental analysis of behavior* 91, 185-196.

744 McHenry, J.A., Otis, J.M., Rossi, M.A., Robinson, J.E., Kosyk, O., Miller, N.W., McElligott, Z.A., Budygin,  
745 E.A., Rubinow, D.R., and Stuber, G.D. (2017). Hormonal gain control of a medial preoptic area social  
746 reward circuit. *Nature neuroscience* 20, 449.

747 Meisel, R.L., Camp, D.M., and Robinson, T.E. (1993). A microdialysis study of ventral striatal dopamine  
748 during sexual behavior in female Syrian hamsters. *Behav Brain Res* 55, 151-157.

749 Meisel, R.L., Joppa, M.A., and Rowe, R.K. (1996). Dopamine receptor antagonists attenuate conditioned  
750 place preference following sexual behavior in female Syrian hamsters. *Eur J Pharmacol* 309, 21-24.

751 Mermelstein, P.G., and Becker, J.B. (1995). Increased extracellular dopamine in the nucleus accumbens  
752 and striatum of the female rat during paced copulatory behavior. *Behav Neurosci* 109, 354-365.

753 Moses, J., Loucks, J.A., Watson, H.L., Matuszewich, L., and Hull, E.M. (1995). Dopaminergic drugs in the  
754 medial preoptic area and nucleus accumbens: effects on motor activity, sexual motivation, and sexual  
755 performance. *Pharmacol Biochem Behav* 51, 681-686.

756 Moy, S.S., Nadler, J.J., Perez, A., Barbaro, R.P., Johns, J.M., Magnuson, T.R., Piven, J., and Crawley, J.N.  
757 (2004). Sociability and preference for social novelty in five inbred strains: an approach to assess autistic-  
758 like behavior in mice. *Genes Brain Behav* 3, 287-302.

759 Navratilova, E., Atcherley, C.W., and Porreca, F. (2015). Brain Circuits Encoding Reward from Pain Relief.  
760 *Trends Neurosci* 38, 741-750.

761 Numan, M. (2007). Motivational systems and the neural circuitry of maternal behavior in the rat. *Dev*  
762 *Psychobiol* 49, 12-21.

763 Numan, M., Numan, M.J., Pliakou, N., Stolzenberg, D.S., Mullins, O.J., Murphy, J.M., and Smith, C.D.  
764 (2005). The effects of D1 or D2 dopamine receptor antagonism in the medial preoptic area, ventral  
765 pallidum, or nucleus accumbens on the maternal retrieval response and other aspects of maternal  
766 behavior in rats. *Behav Neurosci* 119, 1588-1604.

767 Perrigo, G., Bryant, W.C., and vom Saal, F.S. (1990). A unique neural timing system prevents male mice  
768 from harming their own offspring. *J Animal Behaviour* 39, 535-539.

769 Pfaus, J.G., Damsma, G., Nomikos, G.G., Wenkstern, D.G., Blaha, C.D., Phillips, A.G., and Fibiger, H.C.  
770 (1990). Sexual behavior enhances central dopamine transmission in the male rat. *Brain Res* 530, 345-  
771 348.

772 Pfaus, J.G., Damsma, G., Wenkstern, D., and Fibiger, H.C. (1995). Sexual activity increases dopamine  
773 transmission in the nucleus accumbens and striatum of female rats. *Brain Res* 693, 21-30.

774 Phillips, P.E., Stuber, G.D., Heien, M.L., Wightman, R.M., and Carelli, R.M. (2003). Subsecond dopamine  
775 release promotes cocaine seeking. *Nature* 422, 614-618.

776 Pleim, E.T., Matochik, J.A., Barfield, R.J., and Auerbach, S.B. (1990). Correlation of dopamine release in  
777 the nucleus accumbens with masculine sexual behavior in rats. *Brain Res* 524, 160-163.

778 Robinson, D.L., Heien, M.L., and Wightman, R.M. (2002). Frequency of dopamine concentration  
779 transients increases in dorsal and ventral striatum of male rats during introduction of conspecifics. *J*  
780 *Neurosci* 22, 10477-10486.

781 Rosenblatt, J.S. (1967). Nonhormonal basis of maternal behavior in the rat. *Science* 156, 1512-1514.

782 Shnitko, T.A., Mace, K.D., Sullivan, K.M., Martin, W.K., Andersen, E.H., Avram, S.K.W., Johns, J.M., and  
783 Robinson, D.L. (2017). Use of fast scan cyclic voltammetry to assess phasic dopamine release in rat  
784 models of early postpartum maternal behavior and neglect. *Behavioural pharmacology* 28, 648.

785 St John, R.D., and Corning, P.A. (1973). Maternal aggression in mice. *Behav Biol* 9, 635-639.

786 Stagkourakis, S., Spigolon, G., Williams, P., Protzmann, J., Fisone, G., and Broberger, C. (2018). A neural  
787 network for intermale aggression to establish social hierarchy. *Nat Neurosci* 21, 834-842.

788 Stolzenberg, D.S., McKenna, J.B., Keough, S., Hancock, R., Numan, M.J., and Numan, M. (2007).  
789 Dopamine D<sub>1</sub> receptor stimulation of the nucleus accumbens or the medial preoptic area promotes the  
790 onset of maternal behavior in pregnancy-terminated rats. *Behavioral neuroscience* 121, 907.

791 Sun, F., Zeng, J., Jing, M., Zhou, J., Feng, J., Owen, S.F., Luo, Y., Li, F., Wang, H., Yamaguchi, T., *et al.*  
792 (2018). A Genetically Encoded Fluorescent Sensor Enables Rapid and Specific Detection of Dopamine in  
793 Flies, Fish, and Mice. *Cell* 174, 481-496 e419.

794 Sun, F., Zhou, J., Dai, B., Qian, T., Zeng, J., Li, X., Zhuo, Y., Zhang, Y., Wang, Y., Qian, C., *et al.* (2020). Next-  
795 generation GRAB sensors for monitoring dopaminergic activity in vivo. *Nat Methods* 17, 1156-1166.

796 Tenk, C.M., Wilson, H., Zhang, Q., Pitchers, K.K., and Coolen, L.M. (2009). Sexual reward in male rats:  
797 effects of sexual experience on conditioned place preferences associated with ejaculation and  
798 intromissions. *Horm Behav* 55, 93-97.

799 Tidey, J.W., and Miczek, K.A. (1996). Social defeat stress selectively alters mesocorticolimbic dopamine  
800 release: an in vivo microdialysis study. *Brain Res* 721, 140-149.

801 Trezza, V., Campolongo, P., and Vanderschuren, L.J. (2011). Evaluating the rewarding nature of social  
802 interactions in laboratory animals. *Dev Cogn Neurosci* 1, 444-458.

803 Tzschentke, T.M. (2007). Review on CPP: Measuring reward with the conditioned place preference (CPP)  
804 paradigm: update of the last decade. *J Addiction biology* 12, 227-462.  
805 van Erp, A.M., and Miczek, K.A. (2000). Aggressive behavior, increased accumbal dopamine, and  
806 decreased cortical serotonin in rats. *J Neurosci* 20, 9320-9325.  
807 Wang, C.T., Huang, R.L., Tai, M.Y., Tsai, Y.F., and Peng, M.T. (1995). Dopamine release in the nucleus  
808 accumbens during sexual behavior in prenatally stressed adult male rats. *Neurosci Lett* 200, 29-32.  
809 Wang, J., Tai, F., Yu, P., and Wu, R. (2012). Reinforcing properties of pups versus cocaine for fathers and  
810 associated central expression of Fos and tyrosine hydroxylase in mandarin voles (*Microtus mandarinus*).  
811 *Behav Brain Res* 230, 149-157.  
812 Wei, D., Talwar, V., and Lin, D. (2021). Neural circuits of social behaviors: innate yet flexible. *Neuron*.  
813 Wenkstern, D., Pfaus, J.G., and Fibiger, H.C. (1993). Dopamine transmission increases in the nucleus  
814 accumbens of male rats during their first exposure to sexually receptive female rats. *Brain Res* 618, 41-  
815 46.  
816 Westerink, B.H., Damsma, G., De Vries, J.B., and Koning, H. (1987). Dopamine re-uptake inhibitors show  
817 inconsistent effects on the in vivo release of dopamine as measured by intracerebral dialysis in the rat. *J*  
818 *European journal of pharmacology* 135, 123-128.  
819 Wilsoncroft, W. (1968). Babies by bar-press: maternal behavior in the rat. *Behavior Research Methods*  
820 *Instrumentation* 1, 229-230.  
821 Yao, S., Bergan, J., Lanjuin, A., and Dulac, C. (2017). Oxytocin signaling in the medial amygdala is required  
822 for sex discrimination of social cues. *Elife* 6.  
823 Yuan, L., Dou, Y.N., and Sun, Y.G. (2019). Topography of Reward and Aversion Encoding in the  
824 Mesolimbic Dopaminergic System. *J Neurosci* 39, 6472-6481.

825

# Figure 1 – figure supplement 1

bioRxiv preprint doi: <https://doi.org/10.1101/2021.06.22.449478>; this version posted June 23, 2021. The copyright holder for this preprint (which was not certified by peer review) is the author/funder. All rights reserved. No reuse allowed without permission.

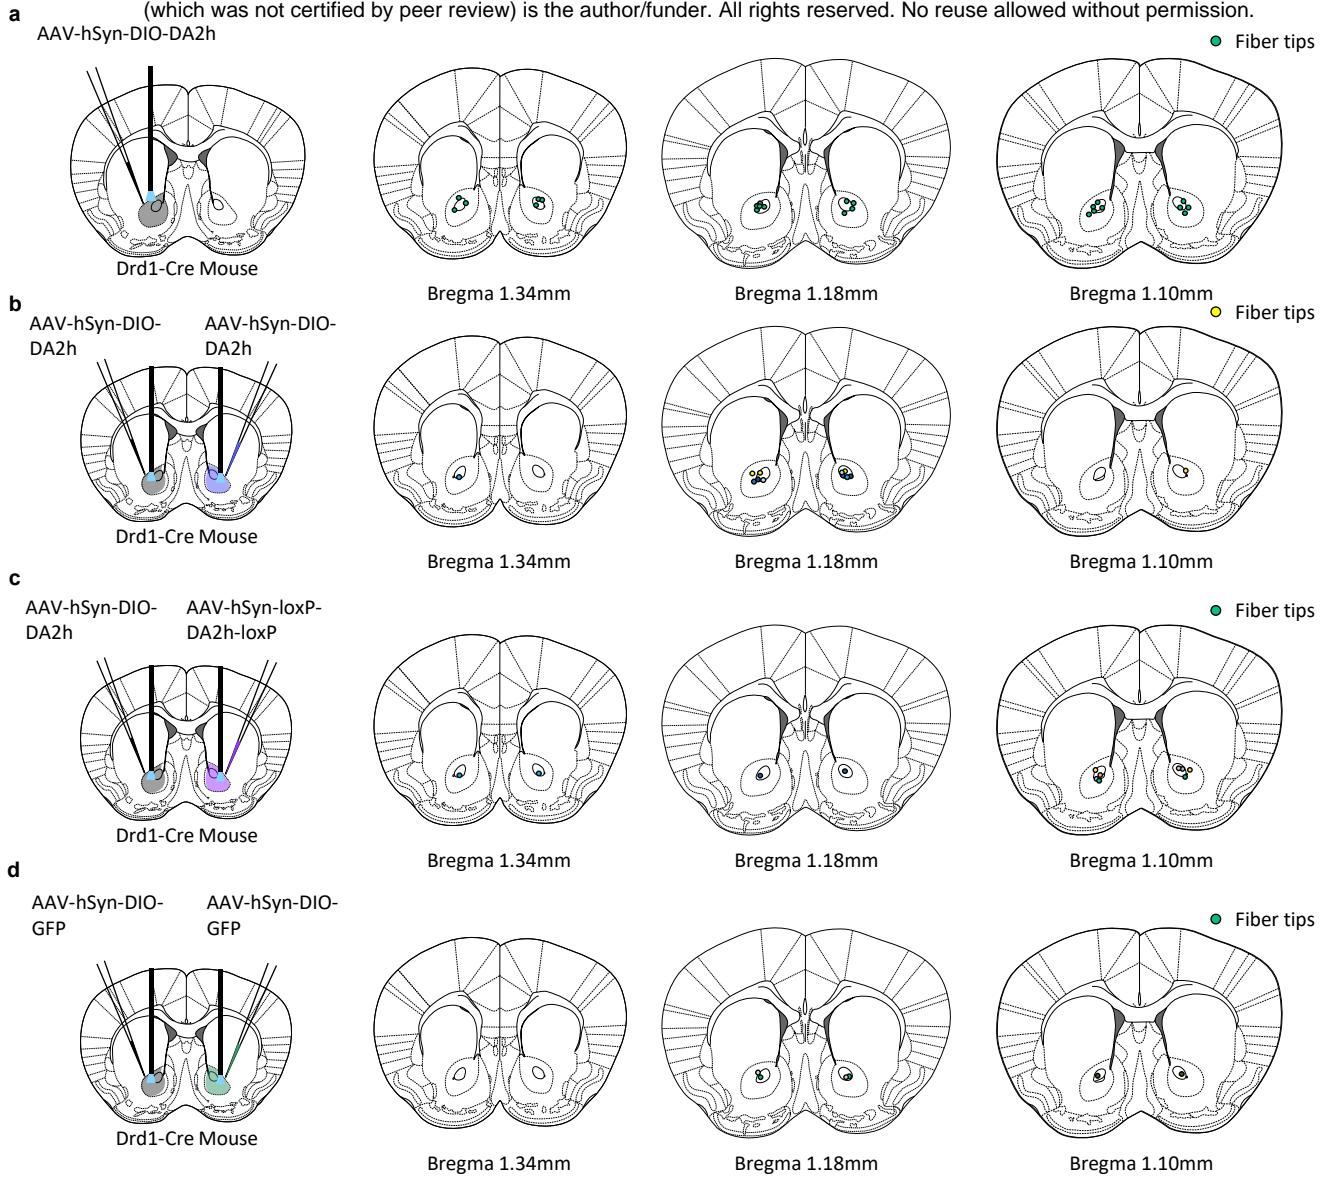

## Figure 1 - figure supplement 1. Optic fiber placements for recordings.

**a-d**, Experimental design (left) and coronal brain sections (right) at the bregma level of NAc showing the optic fiber ends. Each dot represents one animal in **(a)**, and dots with same color in **(b-d)** represent same animal. Brain atlas images are modified from (Franklin and Paxinos, 2013).



# Figure 2—figure supplement 1

bioRxiv preprint doi: <https://doi.org/10.1101/2021.06.22.449478>; this version posted June 23, 2021. The copyright holder for this preprint (which was not certified by peer review) is the author/funder. All rights reserved. No reuse allowed without permission.

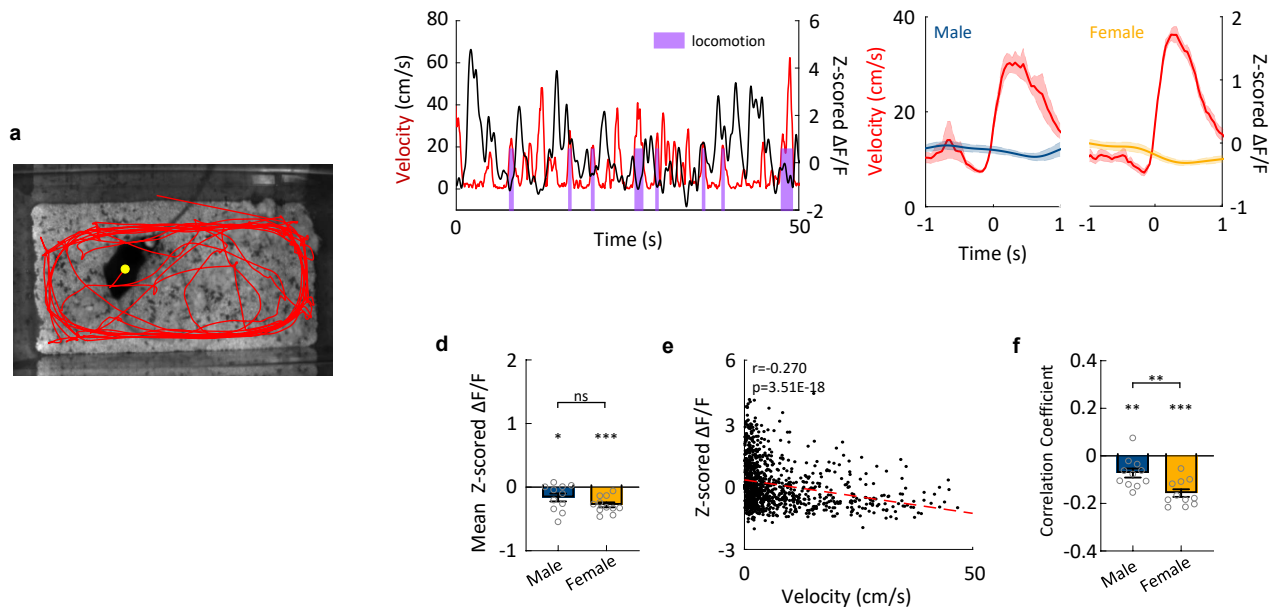

**Figure 2 - figure supplement 1. No increase in DA activity at the onset of locomotion or acceleration.**

**a**, Representative trajectory tracked by DeepLabCut (Mathis et al., 2018).

**b**, Representative traces of velocity (red) and z-scored  $\Delta F/F$  of GRAB<sub>DA2h</sub> (black) from an example male mouse. Color shades indicate periods of locomotion. Similar results were observed from 11 male mice and 11 female mice.

**c**, Average post-event histograms of velocity (red) and GRAB<sub>DA2h</sub> signal aligned to the locomotion onset of males (left) and females (right). Shaded area: s.e.m. (n=11 male mice and n=11 female mice.)

**d**, Averaged Z scored GRAB<sub>DA2h</sub> signal during 0-1s of all locomotion episodes. (n=11 male mice and n=11 female mice. One sample t test revealed significant activity changes, \*p<0.05, \*\*\*p<0.001. Unpaired t-test found no difference between two groups, p=0.12.)

**e**, A scatter plot showing the correlation between velocity and Z scored  $\Delta F/F$  from one example female mouse. Similar results were observed from 11 male mice and 11 female mice. (A thousand data points were randomly selected for visualization, Pearson correlation,  $r = -0.27$ ,  $p = 3.15E-18$ .)

**f**, Summary of correlation coefficient between velocity and Z scored  $\Delta F/F$ . (n=11 male mice and n=11 female mice. One sample t test revealed the correlation coefficients are significantly negative across animals, \*\*p<0.01, \*\*\*p<0.001. Unpaired t-test found a difference between males and females, p = 0.003.)

# Figure 5—figure supplement 1

bioRxiv preprint doi: <https://doi.org/10.1101/2021.06.22.449478>; this version posted June 23, 2021. The copyright holder for this preprint (which was not certified by peer review) is the author/funder. All rights reserved. No reuse allowed without permission.

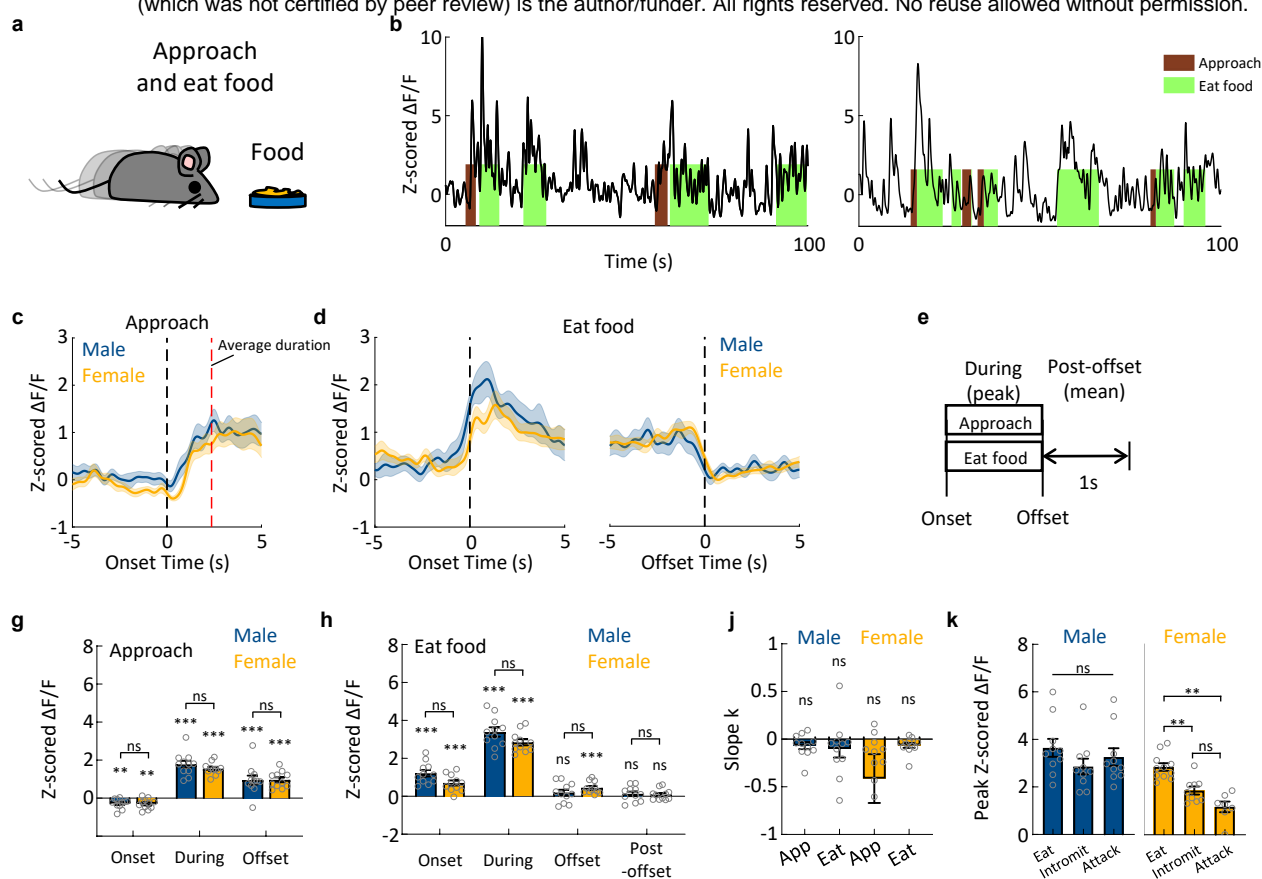

## Figure 5 - figure supplement 1. DA responses during food intake.

**a**, A cartoon illustration of mouse approaching food.

**b**, Representative traces of z-scored  $\Delta F/F$  of GRAB<sub>DA2h</sub> during approach and eat peanut butter. Similar results were observed from 11 male and 11 female mice.

**c**, Average post-event histograms aligned to the onset of approaching food. Shaded area: s.e.m. (n=11 male mice and n=11 female mice.)

**d**, Average post-event histograms aligned to the onset (left) and offset (right) of eating. Shaded area: s.e.m. (n=11 male mice and n=11 female mice.)

**e**, Schematics showing the periods used for characterizing DA responses related to food intake.

**g**, Summary of Z scored GRAB<sub>DA2h</sub> responses at the onset and offset of, and during approach food. Mean  $\pm$  s.e.m overlaid with individual data points for each group. (n=11 male mice and n=11 female mice. One sample t test followed by FDR correction to reveal significant responses, \*\*p<0.01, \*\*\*p<0.001. Two-way ANOVA group x time interaction, F(2,40)=0.6226, p=0.54.)

**h**, Summary of Z scored GRAB<sub>DA2h</sub> responses at the onset and offset of, and during and after eating food. (n=11 male mice and n=11 female mice. One sample t test followed by FDR correction to reveal significant responses, \*\*\*p<0.001. Bonferroni's multiple comparisons following two-way ANOVA revealed no significant difference in responses between males and females.)

**j**, Summary of slope k of GRAB<sub>DA2h</sub> responses over repeated eating episodes. (n=11 male mice, n=11 female mice. One sample t test followed by FDR correction to reveal significant adaptations.)

**k**, Summary of Z scored GRAB<sub>DA2h</sub> responses during food intake, intromission, and attack. (n=10 male mice, one-way ANOVA, F(1.340,12.06)=1.166, p=0.32. n=11 female mice for food intake, n=9 female mice for intromission, n=7 female mice for attack, Tukey's multiple comparisons following one-way ANOVA revealed differences in responses between groups in females, \*\*p<0.01.)

# Figure 5—figure supplement 2

bioRxiv preprint doi: <https://doi.org/10.1101/2021.06.22.449478>; this version posted June 23, 2021. The copyright holder for this preprint (which was not certified by peer review) is the author/funder. All rights reserved. No reuse allowed without permission.

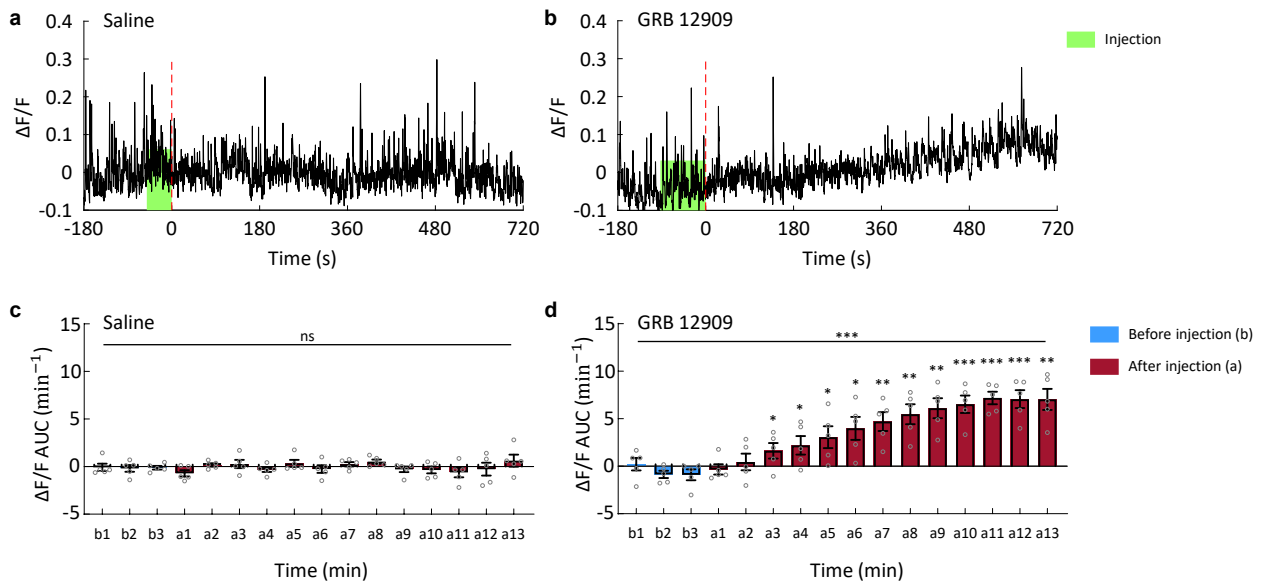

## Figure 5 - figure supplement 2. Administration of DAT inhibitor induces a sustained increase in GRAB<sub>DA2h</sub> signal.

**a-b**, Representative traces of z-scored  $\Delta F/F$  of GRAB<sub>DA2h</sub> after i.p. injection of saline (left) and 20 mg/kg GBR 12909 (right). Similar results were observed from 5 male mice.

**c**, Accumulated DA signals before and after saline treatment. Mean  $\pm$  s.e.m overlaid with data points from individual animals for each group. (n = 5 mice, Friedman test, p=0.58.)

**d**, Accumulated DA signals before and after GBR 12909 treatment. Mean  $\pm$  s.e.m overlaid for each group. (n = 5 mice, Tukey's multiple comparisons following one-way ANOVA revealed the difference between b3 and other time periods, \*p<0.05, \*\*p<0.01, \*\*\*p<0.001.)

# Figure 8– figure supplement 1

bioRxiv preprint doi: <https://doi.org/10.1101/2021.06.22.449478>; this version posted June 23, 2021. The copyright holder for this preprint (which was not certified by peer review) is the author/funder. All rights reserved. No reuse allowed without permission.

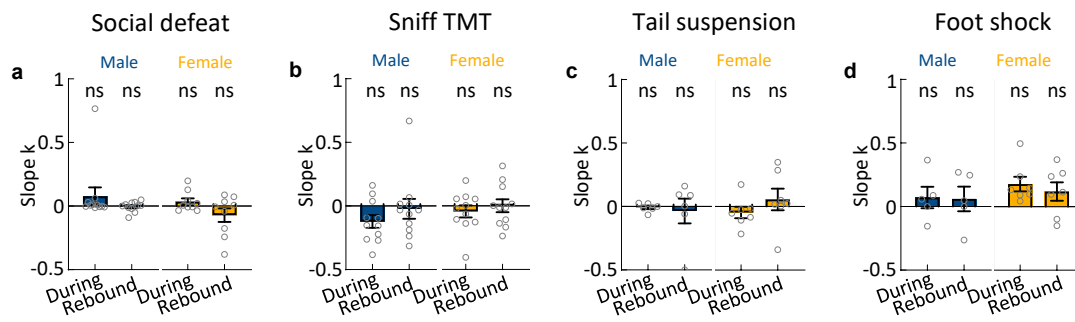

## Figure 8 - figure supplement 1. Dopamine responses during and immediately after aversive experiences do not adapt over repeated trials.

- a**, Summary of slope  $k$  of GRAB<sub>DA2h</sub> responses over repeated defeat events. Mean  $\pm$  s.e.m overlaid with individual data points for each group. ( $n=11$  male mice and  $n=11$  female mice. One sample  $t$  test followed by FDR correction revealed no significant adaption.)
- b**, Summary of slope  $k$  of GRAB<sub>DA2h</sub> responses over repeated TMT exposure. Mean  $\pm$  s.e.m overlaid with individual data points for each group. ( $n=11$  male mice and  $n=11$  female mice. One sample  $t$  test followed by FDR correction revealed no significant adaption.)
- c**, Summary of slope  $k$  of GRAB<sub>DA2h</sub> responses over repeated tail suspension. Mean  $\pm$  s.e.m overlaid with individual data points for each group. ( $n=6$  male mice and  $n=7$  female mice. One sample  $t$  test followed by FDR correction revealed no significant adaption.)
- d**, Summary of slope  $k$  of GRAB<sub>DA2h</sub> responses over repeated 5s foot-shock. Mean  $\pm$  s.e.m overlaid with individual data points for each group. ( $n=5$  male mice and  $n=7$  female mice. One sample  $t$  test followed by FDR correction revealed no significant adaption.)

# Figure 8– figure supplement 2

bioRxiv preprint doi: <https://doi.org/10.1101/2021.06.22.449478>; this version posted June 23, 2021. The copyright holder for this preprint (which was not certified by peer review) is the author/funder. All rights reserved. No reuse allowed without permission.

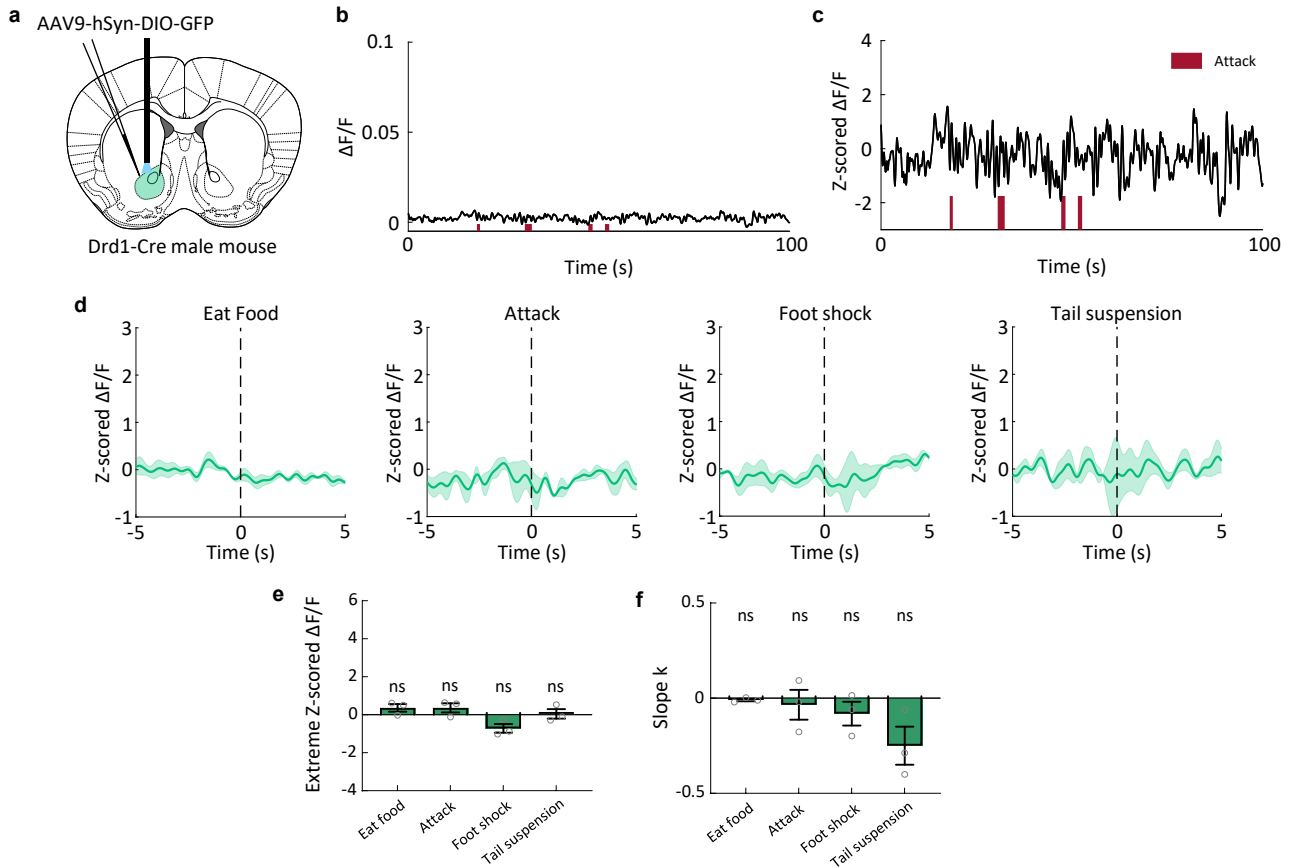

## Figure 8 - figure supplement 2. No change in fluorescence signal during any behaviors in GFP control animals.

**a**, Schematics illustrating the experimental design. Brain atlas images are modified from (Franklin and Paxinos, 2013).

**b-c**, Representative traces of  $\Delta F/F$  (**b**) and Z scored  $\Delta F/F$  (**c**) of GFP during inter-male aggression. Similar results were observed for 3 male mice.

**d**, Average post-event histograms aligned to the onset of eat, attack, foot-shock, and tail suspension. Shaded area: s.e.m. (n = 3 male mice.)

**e**, Maximum GFP increase during food intake and attack, and maximum GFP decrease during tail suspension and foot shock. Mean  $\pm$  s.e.m overlaid with individual data points for each group. (n = 3 male mice. One sample t test followed by FDR correction revealed no significant response.)

**f**, Summary of slope k of GFP responses over repeated events. Mean  $\pm$  s.e.m overlaid for each group. (n=3 male mice. One sample t test followed by FDR correction revealed no significant adaption.)

**Supplementary Table 1**

| Figure         | Part                                                                                                            | Test                                                                                                                                                                                                                   | Exact P-value, F-value with degree of freedom for ANOVAs, t-value with degree of freedom for t-tests                                                                                                                                                                                                                                                                                                                                                                                                                                                                                                                                                |
|----------------|-----------------------------------------------------------------------------------------------------------------|------------------------------------------------------------------------------------------------------------------------------------------------------------------------------------------------------------------------|-----------------------------------------------------------------------------------------------------------------------------------------------------------------------------------------------------------------------------------------------------------------------------------------------------------------------------------------------------------------------------------------------------------------------------------------------------------------------------------------------------------------------------------------------------------------------------------------------------------------------------------------------------|
| 1              | j                                                                                                               | Two-way ANOVA with Bonferroni's multiple comparison test                                                                                                                                                               | Time: $F(1,12)=0.27$ , $df=1$ , $p=0.32$ . Group: $F(2,12)=50.84$ , $df=2$ , $p<0.001$ . Group x time interaction: $F(2,12)=1.474$ , $df=2$ , $p=0.27$ . Bonferroni's multiple comparison: For no-intruder group, $p>0.99$ (DA2h: D1-D1 vs. DA2h: D1-nonD1), $p<0.001$ (DA2h: D1-D1 vs. GFP: D1-D1), $p<0.001$ (DA2h: D1-nonD1 vs. GFP: D1-D1); For with-intruder group, $p>0.99$ (DA2h: D1-D1 vs. DA2h: D1-nonD1), $p<0.001$ (DA2h: D1-D1 vs. GFP: D1-D1), $p<0.001$ (DA2h: D1-nonD1 vs. GFP: D1-D1); for the comparisons between no-intruder and with-intruder groups, $p>0.99$ (DA2h: D1-D1), $p>0.99$ (DA2h: D1-nonD1), $p=0.001$ (GFP: D1-D1). |
| 2              | e                                                                                                               | Friedman test with Dunn's multiple comparison test                                                                                                                                                                     | For the male group, $p=0.007$ , Dunn's multiple comparisons, $p=0.02$ (Object vs. Male), $p=0.02$ (Object vs. Female), $p>0.99$ (Male vs. Female). For the female group, $p=0.006$ , Dunn's multiple comparisons, $p=0.007$ (Object vs. Male), $p=0.18$ (Object vs. Female), $p=0.72$ (Male vs. Female).                                                                                                                                                                                                                                                                                                                                            |
|                | j                                                                                                               | Two-way ANOVA with Bonferroni's multiple comparison test                                                                                                                                                               | Time: $F(2,40)=73.10$ , $df=2$ , $p<0.001$ . Group: $F(1,20)=0.4296$ , $df=1$ , $p=0.52$ . Group x time interaction: $F(2,40)=2.149$ , $df=2$ , $p=0.13$ . Bonferroni's multiple comparisons: $p=0.34$ (Onset), $p=0.98$ (Peak), $p=0.95$ (Offset).                                                                                                                                                                                                                                                                                                                                                                                                 |
|                | k                                                                                                               | One sample t test followed by two-stage step-up method of Benjamini, Krieger and Yekutieli with 0.05 FDR                                                                                                               | For the male, $df=10$ , $p=0.11$ , $q=0.069$ (onset); $df=10$ , $p<0.001$ , $q=0.001$ (peak); $df=10$ , $p=0.04$ , $q=0.032$ (offset). For the female, $df=10$ , $p=0.36$ , $q=0.16$ (onset); $df=10$ , $p<0.001$ , $q=0.001$ (peak); $df=10$ , $p=0.001$ , $q=0.001$ (offset).                                                                                                                                                                                                                                                                                                                                                                     |
|                | k                                                                                                               | Two-way ANOVA with Bonferroni's multiple comparison test                                                                                                                                                               | Time: $F(2,40)=69.85$ , $df=2$ , $p<0.001$ . Group: $F(1,20)=1.243$ , $df=1$ , $p=0.28$ . Group x time interaction: $F(2,40)=0.9988$ , $df=2$ , $p=0.38$ . Bonferroni's multiple comparisons: $p=0.97$ (Onset), $p=0.30$ (Peak), $p=0.76$ (Offset).                                                                                                                                                                                                                                                                                                                                                                                                 |
|                | l                                                                                                               | One sample t test followed by two-stage step-up method of Benjamini, Krieger and Yekutieli with 0.05 FDR                                                                                                               | For the male, $df=10$ , $p=0.97$ , $q=0.34$ (onset); $df=10$ , $p<0.001$ , $q=0.001$ (peak); $df=10$ , $p=0.005$ , $q=0.003$ (offset). For the female, $df=10$ , $p=0.61$ , $q=0.26$ (onset), $df=10$ , $p<0.001$ , $q=0.001$ (peak), $df=10$ , $p=0.001$ , $q=0.001$ (offset).                                                                                                                                                                                                                                                                                                                                                                     |
|                | l                                                                                                               | Two-way ANOVA with Bonferroni's multiple comparison test                                                                                                                                                               | Time: $F(2,40)=75.26$ , $df=2$ , $p<0.001$ . Group: $F(1,20)=1.060$ , $df=1$ , $p=0.32$ . Group x time interaction: $F(2,40)=6.557$ , $df=2$ , $p=0.003$ . Bonferroni's multiple comparisons: $p=0.84$ (Onset), $p=0.008$ (Peak), $p>0.99$ (Offset).                                                                                                                                                                                                                                                                                                                                                                                                |
|                | o                                                                                                               | One sample t test followed by two-stage step-up method of Benjamini, Krieger and Yekutieli with 0.05 FDR                                                                                                               | For the male, $p=0.08$ , $q=0.16$ (object); $p=0.41$ , $q=0.43$ (male); $p=0.1$ , $q=0.16$ (female). For the female, $p=0.05$ , $q=0.16$ (object); $p=0.24$ , $q=0.3$ (male); $p=0.05$ , $q=0.16$ (female).                                                                                                                                                                                                                                                                                                                                                                                                                                         |
| 2-supplement 1 | d                                                                                                               | One sample t test                                                                                                                                                                                                      | $df=10$ , $p=0.03$ (male), $df=10$ , $p<0.001$ (female).                                                                                                                                                                                                                                                                                                                                                                                                                                                                                                                                                                                            |
|                |                                                                                                                 | Unpaired t test                                                                                                                                                                                                        | $t=1.611$ , $df=20$ , $p=0.12$ .                                                                                                                                                                                                                                                                                                                                                                                                                                                                                                                                                                                                                    |
|                | f                                                                                                               | One sample t test                                                                                                                                                                                                      | $df=10$ , $p=0.004$ (male), $df=10$ , $p<0.001$ (female).                                                                                                                                                                                                                                                                                                                                                                                                                                                                                                                                                                                           |
|                |                                                                                                                 | Unpaired t test                                                                                                                                                                                                        | $t=3.368$ , $df=20$ , $p=0.003$ .                                                                                                                                                                                                                                                                                                                                                                                                                                                                                                                                                                                                                   |
| 3              | b                                                                                                               | One-way ANOVA with Tukey's multiple comparisons test                                                                                                                                                                   | For the male, $F(1.203,12.03)=9.151$ , $df=2$ , $p=0.008$ , Tukey's multiple comparisons, $p=0.008$ (object vs. male), $p=0.001$ (object vs. female), $p=0.34$ (male vs. female). For the female, $F(1.938,19.38)=24.43$ , $df=2$ , $p<0.001$ , Tukey's multiple comparisons, $p=0.02$ (object vs. male), $p<0.001$ (object vs. female), $p=0.01$ (male vs. female).                                                                                                                                                                                                                                                                                |
|                | k                                                                                                               | Two-way ANOVA with Bonferroni's multiple comparison test                                                                                                                                                               | Time: $F(2.294,45.86)=34.77$ , $df=3$ , $p<0.001$ . Group: $F(1,20)=1.379$ , $df=1$ , $p=0.25$ . Group x time interaction: $F(3,60)=2.100$ , $df=3$ , $p=0.11$ . Bonferroni's multiple comparisons: $p>0.99$ (Onset), $p>0.99$ (Peak), $p=0.22$ (Offset), $p>0.99$ (Post-offset).                                                                                                                                                                                                                                                                                                                                                                   |
|                |                                                                                                                 | One sample t test followed by two-stage step-up method of Benjamini, Krieger and Yekutieli with 0.05 FDR                                                                                                               | For the male, $df=10$ , $p<0.001$ , $q=2.1e-4$ (onset); $df=10$ , $p<0.001$ , $q=2.1e-4$ (peak); $df=10$ , $p=0.03$ , $q=0.005$ (offset); $df=10$ , $p=0.07$ , $q=0.009$ (post-offset). For the female, $df=10$ , $p<0.001$ , $q=2.1e-4$ (onset); $df=10$ , $p<0.001$ , $q=2.1e-4$ (peak); $df=10$ , $p<0.001$ , $q=2.1e-4$ (offset); $df=10$ , $p=0.02$ , $q=0.004$ (post-offset).                                                                                                                                                                                                                                                                 |
|                | l                                                                                                               | Two-way ANOVA with Bonferroni's multiple comparison test                                                                                                                                                               | Time: $F(2.027,40.55)=119.0$ , $df=3$ , $p<0.001$ . Group: $F(1,20)=0.1028$ , $df=1$ , $p=0.75$ . Group x time interaction: $F(3,60)=1.707$ , $df=3$ , $p=0.18$ . Bonferroni's multiple comparisons: $p>0.99$ (Onset), $p>0.99$ (Peak), $p=0.32$ (Offset), $p>0.99$ (Post-offset).                                                                                                                                                                                                                                                                                                                                                                  |
|                |                                                                                                                 | One sample t test followed by two-stage step-up method of Benjamini, Krieger and Yekutieli with 0.05 FDR                                                                                                               | For the male, $df=10$ , $p=0.005$ , $q=0.004$ (onset); $df=10$ , $p<0.001$ , $q=0.001$ (peak); $df=10$ , $p=0.24$ , $q=0.126$ (offset); $df=10$ , $p=0.04$ , $q=0.158$ (post-offset). For the female, $df=10$ , $p<0.001$ , $q=0.001$ (onset); $df=10$ , $p<0.001$ , $q=0.001$ (peak); $df=10$ , $p=0.01$ , $q=0.006$ (offset); $df=10$ , $p=0.04$ , $q=0.158$ (post-offset).                                                                                                                                                                                                                                                                       |
|                | m                                                                                                               | Two-way ANOVA with Bonferroni's multiple comparison test                                                                                                                                                               | Time: $F(2.473,45.45)=127.4$ , $df=3$ , $p<0.001$ . Group: $F(1,20)=0.8114$ , $df=1$ , $p=0.38$ . Group x time interaction: $F(3,60)=1.030$ , $df=3$ , $p=0.39$ . Bonferroni's multiple comparisons: $p>0.99$ (Onset), $p>0.99$ (Peak), $p=0.61$ (Offset), $p>0.99$ (Post-offset).                                                                                                                                                                                                                                                                                                                                                                  |
|                |                                                                                                                 | One sample t test followed by two-stage step-up method of Benjamini, Krieger and Yekutieli with 0.05 FDR                                                                                                               | For the male, $df=10$ , $p=0.001$ , $q=0.001$ (onset); $df=10$ , $p<0.001$ , $q=0.001$ (peak); $df=10$ , $p=0.06$ , $q=0.032$ (offset); $df=10$ , $p=0.52$ , $q=0.205$ (post-offset). For the female, $df=10$ , $p<0.001$ , $q=0.001$ (onset); $df=10$ , $p<0.001$ , $q=0.001$ (peak); $df=10$ , $p=0.02$ , $q=0.013$ (offset); $df=10$ , $p=0.45$ , $q=0.203$ (post-offset).                                                                                                                                                                                                                                                                       |
| p              | One sample Wilcoxon test followed by two-stage step-up method of Benjamini, Krieger and Yekutieli with 0.05 FDR | For the male, $p=0.01$ , $q=0.011$ (object); $p<0.001$ , $q=0.002$ (male); $p<0.001$ , $q=0.002$ (female). For the female, $p=0.01$ , $q=0.11$ (object); $p<0.001$ , $q=0.002$ (male); $p<0.001$ , $q=0.002$ (female). |                                                                                                                                                                                                                                                                                                                                                                                                                                                                                                                                                                                                                                                     |

bioRxiv preprint doi: <https://doi.org/10.1101/2021.06.22.449476>; this version posted June 23, 2021. The copyright holder for this preprint (which was not certified by peer review) is the author/funder. All rights reserved. No reuse allowed without permission.

|                |                                                                                                          |                                                                                                                                                                                                                                                                                                                                                |                                                                                                                                                                                                                                                                                                                                                 |
|----------------|----------------------------------------------------------------------------------------------------------|------------------------------------------------------------------------------------------------------------------------------------------------------------------------------------------------------------------------------------------------------------------------------------------------------------------------------------------------|-------------------------------------------------------------------------------------------------------------------------------------------------------------------------------------------------------------------------------------------------------------------------------------------------------------------------------------------------|
| 4              | i                                                                                                        | Mann-Whitney test                                                                                                                                                                                                                                                                                                                              | p<0.001                                                                                                                                                                                                                                                                                                                                         |
|                | k                                                                                                        | Two-way ANOVA with Bonferroni's multiple comparison test                                                                                                                                                                                                                                                                                       | Time: F(3,60)=36.9, df=3, p<0.001. Group: F(1,20)=35.21, df=1, p<0.001. Group x time interaction: F(3,60)=47.76, df=3, p<0.001. Bonferroni's multiple comparisons: p<0.001 (Onset), p<0.001 (Peak), p>0.99(Offset), p>0.99(Post-offset).                                                                                                        |
|                |                                                                                                          | One sample t test followed by two-stage step-up method of Benjamini, Krieger and Yekutieli with 0.05 FDR                                                                                                                                                                                                                                       | For the male, df=10, p=0.006, q=0.001 (onset); df=10, p<0.001, q=2.625e-004 (peak); df=10, p=0.003, q=0.001(offset); df=10, p=0.02, q=0.003(post-offset). For the female, df=10, p=0.05, q=0.007 (onset); df=10, p<0.001, q=2.625e-004 (peak); df=10, p<0.001, q=2.625e-004 (offset); df=10, p<0.001, q=2.625e-004 (post-offset).               |
|                | l                                                                                                        | Two-way ANOVA with Bonferroni's multiple comparison test                                                                                                                                                                                                                                                                                       | Time: F(3,39)=85.48, df=3, p<0.001. Group: F(1,13)=1.546, df=1, p=0.24. Group x time interaction: F(3,39)=17.70, df=3, p<0.001. Bonferroni's multiple comparisons: p=0.2(Onset), p>0.99(Peak), p<0.001 (Offset), p=0.005(Post-offset).                                                                                                          |
|                |                                                                                                          | One sample t test followed by two-stage step-up method of Benjamini, Krieger and Yekutieli with 0.05 FDR                                                                                                                                                                                                                                       | For the male, p=0.007, q=0.004 (onset); p<0.001, q=0.001 (peak); p<0.001, q=0.001(offset); p<0.001, q=0.001(post-offset). For the female, p=0.58, q=0.261 (onset); p<0.001, q=0.001 (peak); p=0.16, q=0.084 (offset); p=0.85, q=0.335 (post-offset).                                                                                            |
|                | m                                                                                                        | Two-way ANOVA with Bonferroni's multiple comparison test                                                                                                                                                                                                                                                                                       | Time: F(3,54)=135.6, df=3, p<0.001. Group: F(1,18)=0.6076, df=1, p=0.45. Group x time interaction: F(3,54)=19.51, df=3, p<0.001. Bonferroni's multiple comparisons: p=0.2(Onset), p<0.001(Peak), p=0.41 (Offset), p=0.02(Post-offset).                                                                                                          |
|                |                                                                                                          | One sample t test followed by two-stage step-up method of Benjamini, Krieger and Yekutieli with 0.05 FDR                                                                                                                                                                                                                                       | For the male, df=7, p<0.001, q=0.001 (onset); df=7, p<0.001, q=0.001 (peak); df=7, p=0.05, q=0.001(offset); df=7, p<0.001, q=0.001(post-offset). For the female, df=6, p=0.003, q=0.002 (onset); df=6, p<0.001, q=0.001 (peak); df=6, p=0.25, q=0.113 (offset); df=6, p=0.81, q=0.319 (post-offset).                                            |
| n              | Two-way ANOVA with Bonferroni's multiple comparison test                                                 | Time: F(3,54)=160.8, df=3, p<0.001. Group: F(1,18)=0.2174, df=1, p=0.65. Group x time interaction: F(3,54)=1.949, df=3, p=0.13. Bonferroni's multiple comparisons: p>0.99(Onset), p>0.99(Peak), p=0.38 (Offset), p>0.99(Post-offset).                                                                                                          |                                                                                                                                                                                                                                                                                                                                                 |
|                | One sample t test followed by two-stage step-up method of Benjamini, Krieger and Yekutieli with 0.05 FDR | For the male, df=10, p=0.07, q=0.147 (onset); df=10, p<0.001, q=0.003 (peak); df=10, p=0.13, q=0.167(offset); df=10, p=0.10, q=0.158(post-offset). For the female, df=8, p=0.61, q=0.558 (onset); df=8, p<0.001, q=0.003 (peak); df=8, p=0.62, q=0.558 (offset); df=8, p=0.80, q=0.63 (post-offset).                                           |                                                                                                                                                                                                                                                                                                                                                 |
| o              | One sample t test followed by two-stage step-up method of Benjamini, Krieger and Yekutieli with 0.05 FDR | For the male, p=0.14, q=0.44(mount unreceptive); p=0.07, q=0.25(mount receptive); p=0.51, q=0.64(intromission). For the female, p=0.47, q=0.64(mount unreceptive); p=0.7, q=0.74(mount receptive); p=0.46, q=0.64(intromission).                                                                                                               |                                                                                                                                                                                                                                                                                                                                                 |
| 5              | f                                                                                                        | Two-way ANOVA with Bonferroni's multiple comparison test                                                                                                                                                                                                                                                                                       | Time: F(3,45)=31.16, df=3, p<0.001. Group: F(1,15)=22.92, df=1, p<0.001. Group x time interaction: F(3,45)=4.979, df=3, p=0.005. Bonferroni's multiple comparisons: p=0.10(Onset), p<0.001(Peak), p=0.07(Offset), p>0.99(Post-offset).                                                                                                          |
|                |                                                                                                          | One sample t test followed by two-stage step-up method of Benjamini, Krieger and Yekutieli with 0.05 FDR                                                                                                                                                                                                                                       | For the male, df=9, p<0.001, q=0.001 (onset); df=9, p<0.001, q=0.001 (peak); df=9, p<0.001, q=0.001(offset); df=9, p=0.08, q=0.056(post-offset). For the female, df=6, p=0.04, q=0.034(onset); df=6, p=0.002, q=0.002 (peak); df=6, p=0.59, q=0.31(offset); df=6, p=0.43, q=0.258 (post-offset).                                                |
|                | g                                                                                                        | Mann-Whitney test                                                                                                                                                                                                                                                                                                                              | p=0.60                                                                                                                                                                                                                                                                                                                                          |
|                | h                                                                                                        | Friedman test with with Dunn's multiple comparison test                                                                                                                                                                                                                                                                                        | p<0.001. Dunn's multiple comparisons, p>0.99 (b3 vs. b1), p>0.99 (b3 vs. b2), p<0.001 (b3 vs. i1), p=0.10 (b3 vs. i2), p=0.52 (b3 vs. i3), p>0.99 (b3 vs. i4), p=0.25 (b3 vs. i5), p=0.46 (b3 vs. i6), p=0.36 (b3 vs. i7), p=0.19 (b3 vs. i8), p>0.99 (b3 vs. i9), p=0.25 (b3 vs.i10), p>0.99 (b3 vs.a1), p>0.99 (b3 vs.a2), p>0.99 (b3 vs.a3). |
| i              | Friedman test with with Dunn's multiple comparison test                                                  | p=0.004. Dunn's multiple comparisons, p=0.32 (b3 vs. b1), p=0.65 (b3 vs. b2), p=0.37 (b3 vs. i1), p>0.99 (b3 vs. i2), p>0.99 (b3 vs. i3), p>0.99 (b3 vs. i4), p>0.99 (b3 vs. i5), p>0.99 (b3 vs. i6), p>0.99 (b3 vs. i7), p>0.99 (b3 vs. i8), p>0.99 (b3 vs. i9), p>0.99 (b3 vs.i10), p>0.99 (b3 vs.a1), p>0.99 (b3 vs.a2), p>0.99 (b3 vs.a3). |                                                                                                                                                                                                                                                                                                                                                 |
| 5-supplement 1 | g                                                                                                        | Two-way ANOVA with Bonferroni's multiple comparison test                                                                                                                                                                                                                                                                                       | Time: F(3,40)=141.6, df=3, p<0.001. Group: F(1,20)=0.2653, df=1, p=0.61. Group x time interaction: F(2,40)=0.6226, df=2, p=0.54. Bonferroni's multiple comparisons: p>0.99(Onset), p=0.80(Peak), p>0.99(Offset).                                                                                                                                |
|                |                                                                                                          | One sample t test followed by two-stage step-up method of Benjamini, Krieger and Yekutieli with 0.05 FDR                                                                                                                                                                                                                                       | For the male, df=10, p=0.005, q=0.005 (onset); df=10, p<0.001, q=0.002(peak); df=10, p=0.002, q=0.003(offset). For the female, df=10, p=0.004, q=0.005 (onset); df=10, p<0.001, q=0.002(peak); df=10, p<0.001, q=0.002(offset).                                                                                                                 |
|                | h                                                                                                        | Two-way ANOVA with Bonferroni's multiple comparison test                                                                                                                                                                                                                                                                                       | Time: F(3,60)=303.7, df=3, p<0.001. Group: F(1,20)=1.537, df=1, p=0.23. Group x time interaction: F(3,60)=5.945, df=3, p=0.001. Bonferroni's multiple comparisons: p=0.08(Onset), p=0.06(Peak), p=0.96(Offset), p>0.99(Post-offset).                                                                                                            |
|                |                                                                                                          | One sample t test followed by two-stage step-up method of Benjamini, Krieger and Yekutieli with 0.05 FDR                                                                                                                                                                                                                                       | For the male, df=10, p<0.001, q=0.001 (onset); df=10, p<0.001, q=0.001 (peak); df=10, p=0.25, q=0.131(offset); df=10, p=0.31, q=0.134 (post-offset). For the female, df=10, p<0.001, q=0.001 (onset); df=10, p<0.001, q=0.001 (peak); df=10, p<0.001, q=0.001 (offset); df=10, p=0.34, q=0.134 (post-offset).                                   |
|                | j                                                                                                        | One sample t test followed by two-stage step-up method of Benjamini, Krieger and Yekutieli with 0.05 FDR                                                                                                                                                                                                                                       | For the male, df=10, p=0.1, q=0.14(app); df=10, p=0.28, q=0.29(eat). For the female, df=10, p=0.02, q=0.06 (app), df=10, p=0.03, q=0.06(eat).                                                                                                                                                                                                   |
| k              | One-way ANOVA with Tukey's multiple comparisons test                                                     | For the male, F(1.34,12.06)=1.166, df=2, p=0.32. For the female, F(1.546, 18.55)=21.78, p<0.001, Tukey's multiple comparisons, p=0.008 (eat vs. intromit), p=0.001 (eat vs. attack), p=0.30 (intromit vs. attack).                                                                                                                             |                                                                                                                                                                                                                                                                                                                                                 |
| c              | Friedman test                                                                                            | p=0.58.                                                                                                                                                                                                                                                                                                                                        |                                                                                                                                                                                                                                                                                                                                                 |

bioRxiv preprint doi: <https://doi.org/10.1101/2021.06.22.449479>; this version posted June 23, 2021. The copyright holder for this preprint (which was not certified by peer review) is the author/funder. All rights reserved. No reuse allowed without permission.

|                |   |                                                                                                          |                                                                                                                                                                                                                                                                                                                                                                                                                              |
|----------------|---|----------------------------------------------------------------------------------------------------------|------------------------------------------------------------------------------------------------------------------------------------------------------------------------------------------------------------------------------------------------------------------------------------------------------------------------------------------------------------------------------------------------------------------------------|
| 5-supplement 2 | d | One-way ANOVA with Tukey's multiple comparisons test                                                     | F(1,976, 7.906)=37.67, df=15, p<0.001. Tukey's multiple comparisons, p=0.90 (b3 vs. b1), p>0.99 (b3 vs. b2), p=0.91 (b3 vs. a1), p=0.52 (b3 vs. a2), p=0.03 (b3 vs. a3), p=0.03 (b3 vs. a4), p=0.03 (b3 vs. a5), p=0.01 (b3 vs. a6), p=0.002 (b3 vs. a7), p=0.002 (b3 vs. a8), p=0.001 (b3 vs. a9), p<0.001 (b3 vs. a10), p<0.001 (b3 vs. a11), p<0.001 (b3 vs. a12), p=0.001 (b3 vs. a13).                                  |
| 6              | k | One sample t test followed by two-stage step-up method of Benjamini, Krieger and Yekutieli with 0.05 FDR | For the onset, df=4, p=0.11, q=0.05 (HM), df=4, p=0.31, q=0.122 (NHM), df=9, p=0.77, q=0.249(FM); for the during, df=4, p=0.002, q=0.002 (HM), df=4, p=0.009, q=0.005 (NHM), df=9, p<0.001, q=0.001 (FM); for the offset, df=4, p=0.001, q=0.001 (HM), df=4, p=0.003, q=0.002 (NHM), df=9, p<0.001, q=0.001(FM).                                                                                                             |
|                |   | One-way ANOVA with Tukey's multiple comparisons test                                                     | For the onset, F(2,17)=1.280, df=2, p=0.3. For the during, F(2,17)=19.85, df=2, p<0.001; Tukey's multiple comparisons, p=0.08(HM vs. NHM), p<0.001(HM vs. FM), p=0.008(NHM vs. FM). For the offset, F(2,17)=27.99, df=2, p<0.001; Tukey's multiple comparisons, p=0.3(HM vs. NHM), p<0.001(HM vs. FM), p<0.001(NHM vs. FM).                                                                                                  |
|                | l | One sample t test followed by two-stage step-up method of Benjamini, Krieger and Yekutieli with 0.05 FDR | For the onset, df=4, p<0.001, q=0.001 (HM), df=4, p<0.001, q=0.001 (NHM), df=9, p<0.001, q=0.001(FM); for the during, df=4, p<0.001, q=0.001 (HM), df=4, p<0.001, q=0.001 (NHM), df=9, p<0.001, q=0.001 (FM); for the offset, df=4, p=0.82, q=0.431 (HM), df=4, p=0.39, q=0.223 (NHM), df=9, p=0.20, q=0.126(FM); for the post-offset, df=4, p=0.07, q=0.063 (HM), df=4, p=0.09, q=0.071 (NHM), df=9, p=0.12, q=0.084(FM).   |
|                |   | One-way ANOVA with Tukey's multiple comparisons test                                                     | For the onset, F(2,17)=2.737, df=2, p=0.09. For the during, F(2,17)=19.85, df=2, p<0.001; Tukey's multiple comparisons, p=0.08(HM vs. NHM), p<0.001(HM vs. FM), p=0.008(NHM vs. FM). For the offset, F(2,17)=27.99, df=2, p<0.001; Tukey's multiple comparisons, p=0.3(HM vs. NHM), p<0.001(HM vs. FM), p<0.001(NHM vs. FM).                                                                                                 |
|                | m | One sample t test followed by two-stage step-up method of Benjamini, Krieger and Yekutieli with 0.05 FDR | For the onset, df=4, p=0.07, q=0.110; for the during, df=4, p<0.001, q=0.003; for the offset, df=4, p=0.90, q=0.709; for the post-offset, df=4, p=0.66, q=0.693.                                                                                                                                                                                                                                                             |
|                | n | One sample t test followed by two-stage step-up method of Benjamini, Krieger and Yekutieli with 0.05 FDR | For the onset, df=9, p<0.001, q=0.002; for the during, df=9, p<0.001, q=0.002; for the offset, df=9, p=0.002, q=0.003; for the post-offset, df=9, p=0.003, q=0.003.                                                                                                                                                                                                                                                          |
| 7              | k | One sample t test followed by two-stage step-up method of Benjamini, Krieger and Yekutieli with 0.05 FDR | For the onset, df=9, p=0.002, q=0.001(NNF), df=5, p=0.22, q=0.051 (NMF), df=9, p=0.21, q=0.051(MF); for the during, df=9, p<0.001, q=0.001 (NNF), df=5, p=0.002, q=0.001 (NMF), df=9, p<0.001, q=0.001 (MF); for the offset, df=9, p<0.001, q=0.001 (NNF), df=5, p=0.01, q=0.003 (NMF), df=9, p<0.001, q=0.001(MF).                                                                                                          |
|                |   | One-way ANOVA with Tukey's multiple comparisons test                                                     | For the onset, F(2,23)=5.216, df=2, p=0.01; Tukey's multiple comparisons, p=0.63(NNF vs. NMF), p=0.01(NNF vs. MF), p=0.18(NMF vs. MF). For the during, F(2,23)=7.914, df=2, p=0.002; Tukey's multiple comparisons, p=0.66(NNF vs. NMF), p=0.002(NNF vs. MF), p=0.05(NMF vs. MF). For the offset, F(2,23)=7.564, df=2, p=0.003; Tukey's multiple comparisons, p=0.55(NNF vs. NMF), p=0.002(NNF vs. MF), p=0.08(NMF vs. MF).   |
|                | l | One sample t test followed by two-stage step-up method of Benjamini, Krieger and Yekutieli with 0.05 FDR | For the onset, df=9, p<0.001, q=0.001(NNF), df=5, p=0.007, q=0.007 (NMF), df=9, p<0.001, q=0.001(MF); for the during, df=9, p<0.001, q=0.001 (NNF), df=5, p<0.001, q=0.001 (NMF), df=9, p<0.001, q=0.001 (MF); for the offset, df=9, p=0.87, q=0.457 (NNF), df=5, p=0.36, q=0.252 (NMF), df=9, p=0.27, q=0.213(MF); for the post-offset, df=9, p=0.07, q=0.063 (NNF), df=5, p=0.51, q=0.292(NMF), df=9, p=0.42, q=0.265(MF). |
|                |   | One-way ANOVA with Tukey's multiple comparisons test                                                     | For the onset, F(2,23)=2.195, df=2, p=0.13. For the during, F(2,23)=5.842, df=2, p=0.009; Tukey's multiple comparisons, p=0.007(NNF vs. NMF), p=0.19(NNF vs. MF), p=0.18(NMF vs. MF). For the offset, F(2,23)=0.6654, df=2, p=0.52. For the post-offset, F(2,23)=1.946, df=2, p=0.17.                                                                                                                                        |
|                | m | One sample t test followed by two-stage step-up method of Benjamini, Krieger and Yekutieli with 0.05 FDR | For the onset, df=5, p=0.04, q=0.053 (NMF), df=9, p<0.001, q=0.002(MF); for the during, df=5, p<0.001, q=0.002 (NMF), df=9, p<0.001, q=0.002 (MF); for the offset, df=5, p=0.92, q=0.604 (NMF), df=9, p=0.58, q=0.435(MF); for the post-offset, df=5, p=0.27, q=0.236(NMF), df=9, p=0.09, q=0.095(MF).                                                                                                                       |
|                |   | Unpaired t test                                                                                          | For the onset, t=0.9661, df=14, p=0.35; for the during, t=1.208, df=14, p=0.25; for the offset, t=0.1535, df=14, p=0.88; for the post-offset, t=0.1388, df=14, p=0.89.                                                                                                                                                                                                                                                       |
| 8              | d | Two-way ANOVA with Bonferroni's multiple comparison test                                                 | Time: F(3,54)=117.7, df=3, p<0.001. Group: F(1,18)=1.443, df=1, p=0.25. Group x time interaction: F(3,54)=2.594, df=3, p=0.06. Bonferroni's multiple comparisons: p>0.99(Onset), p>0.99(Peak), p>0.99(Offset), p=0.02(Post-offset).                                                                                                                                                                                          |
|                |   | One sample t test followed by two-stage step-up method of Benjamini, Krieger and Yekutieli with 0.05 FDR | For the onset, df=10, p=0.03, q=0.011(male); df=8, p=0.22, q=0.066(female). For the during, p<0.001, df=10, q=0.001(male); df=8, p<0.001, q=0.001(female). For the offset, df=10, p=0.005, q=0.002 (male); df=8, p=0.31, q=0.081(female). For the post-offset, df=10, p<0.001, q=0.001(male); df=8, p<0.001, q=0.001(female).                                                                                                |
|                | h | Two-way ANOVA with Bonferroni's multiple comparison test                                                 | Time: F(3,60)=183.0, df=3, p<0.001. Group: F(1,20)=1.143, df=1, p=0.30. Group x time interaction: F(3,60)=9.848, df=3, p<0.001. Bonferroni's multiple comparisons: p>0.99(Onset), p=0.86(Peak), p>0.99(Offset), p<0.001(Post-offset).                                                                                                                                                                                        |
|                |   | One sample t test followed by two-stage step-up method of Benjamini, Krieger and Yekutieli with 0.05 FDR | For the onset, df=10, p=0.01, q=0.011(male); df=10, p=0.001, q=0.001(female). For the during, df=10, p<0.001, q=0.001(male); df=10, p<0.001, q=0.001(female). For the offset, df=10, p<0.001, q=0.001 (male); df=10, p<0.001, q=0.001(female). For the post-offset, df=10, p<0.001, q=0.001(male); df=10, p=0.002, q=0.002(female).                                                                                          |
|                |   | Two-way ANOVA with Bonferroni's multiple comparison test                                                 | Time: F(3,33)=92.07, df=3, p<0.001. Group: F(1,11)=2.695, df=1, p=0.13. Group x time interaction: F(3,33)=9.848, df=3, p=0.17. Bonferroni's multiple comparisons: p>0.99(Onset), p>0.99(Peak), p>0.99(Offset), p=0.03(Post-offset).                                                                                                                                                                                          |

bioRxiv preprint doi: <https://doi.org/10.1101/2021.06.22.449478>; this version posted June 23, 2021. The copyright holder for this preprint (which was not certified by peer review) is the author/funder. All rights reserved. No reuse allowed without permission.



|                |               |                                                                                                                 |                                                                                                                                                                                                                                                                                                                      |
|----------------|---------------|-----------------------------------------------------------------------------------------------------------------|----------------------------------------------------------------------------------------------------------------------------------------------------------------------------------------------------------------------------------------------------------------------------------------------------------------------|
| 8              | i             | One sample t test followed by two-stage step-up method of Benjamini, Krieger and Yekutieli with 0.05 FDR        | For the onset, df=5, p=0.14, q= 0.037(male); df=6, p=0.07, q=0.021(female).For the during, p<0.001, df=5,q=0.001(male); df=6, p<0.001, q=0.001(female). For the offset, df=5,p=0.03, q=0.011(male); df=6, p=0.01, q=0.004(female). For the post-offset, df=5,p<0.001, q=0.001(male); df=6, p=0.003, q=0.002(female). |
|                | p             | Two-way ANOVA with Bonferroni's multiple comparison test                                                        | Time: F(3,30)=74.71, df=3, p<0.001. Group: F(1,10)=0.3665, df=1, p=0.56. Group x time interaction: F(3,30)=0.3650, df=3, p=0.78. Bonferroni's multiple comparisons: p>0.99(Onset), p>0.99(Peak), p>0.99(Offset), p>0.99(Post-offset).                                                                                |
|                |               | One sample t test followed by two-stage step-up method of Benjamini, Krieger and Yekutieli with 0.05 FDR        | For the onset, df=4, p=0.02, q= 0.008(male); df=6, p=0.18, q=0.053(female).For the during, df=4, p<0.001, q=0.001(male); df=6, p<0.001, q=0.001(female). For the post-offset,df=4, p=0.02, q=0.053(male); df=6, p=0.03, q=0.011(female).                                                                             |
|                | t             | During: Friedman test                                                                                           | p=0.43.                                                                                                                                                                                                                                                                                                              |
|                |               | Rebound: One-way ANOVA with Tukey's multiple comparisons test                                                   | F(1.124, 5.618)=19.17, df=3, p=0.005. Tukey's multiple comparisons, p=0.97 (5s vs. 10s), p=0.04 (5s vs. 20s), p=0.01 (5s vs. 60s), p=0.05 (10s vs. 20s), p=0.03 (10s vs. 60s), p=0.03 (20s vs. 60s).                                                                                                                 |
|                | u             | During: One-way ANOVA with Tukey's multiple comparisons test                                                    | F(1.567, 9.405)=0.5401, df=3, p=0.56. Tukey's multiple comparisons, p=0.59 (5s vs. 10s), p=0.73 (5s vs. 20s), p=0.98 (5s vs. 60s), p>0.99 (10s vs. 20s), p=0.95 (10s vs. 60s), p=0.85 (20s vs. 60s).                                                                                                                 |
|                |               | Rebound: One-way ANOVA with Tukey's multiple comparisons test                                                   | F(1.255, 7.527)=19.25, df=3, p=0.002. Tukey's multiple comparisons, p>0.99 (5s vs. 10s), p=0.53 (5s vs. 20s), p=0.02 (5s vs. 60s), p=0.1 (10s vs. 20s), p=0.009 (10s vs. 60s), p=0.006 (20s vs. 60s).                                                                                                                |
|                | v             | One-way ANOVA with Tukey's multiple comparisons test                                                            | F(2.286, 27.43)=27.27, df=3, p<0.001. Tukey's multiple comparisons, p=0.06 (5s vs. 10s), p<0.001 (5s vs. 20s), p<0.001 (5s vs. 60s), p=0.005 (10s vs. 20s), p=0.004 (10s vs. 60s), p=0.31 (20s vs. 60s).                                                                                                             |
|                | w             | During: One-way ANOVA with Tukey's multiple comparisons test                                                    | F(1.751, 12.26)=9.89, df=2, p=0.003. Tukey's multiple comparisons, p=0.03 (2s vs. 5s), p=0.004 (2s vs. 10s), p=0.64 (5s vs. 10s).                                                                                                                                                                                    |
|                |               | Rebound: One-way ANOVA with Tukey's multiple comparisons test                                                   | F(1.359, 9.512)=41.62, df=2, p<0.001. Tukey's multiple comparisons, p=0.09 (2s vs. 5s), p<0.001 (2s vs. 10s), p<0.001 (5s vs. 10s).                                                                                                                                                                                  |
| x              | Paired t test | t=0.4245, df=7, p=0.68.                                                                                         |                                                                                                                                                                                                                                                                                                                      |
| 8-supplement 1 | a             | One sample Wilcoxon test followed by two-stage step-up method of Benjamini, Krieger and Yekutieli with 0.05 FDR | For the male, p=0.28, q=0.7(During); p=0.97, q=1(Rebound). For the female, p=0.50, q=0.7(During); p=0.50, q=0.7(Rebound).                                                                                                                                                                                            |
|                | b             | One sample Wilcoxon test followed by two-stage step-up method of Benjamini, Krieger and Yekutieli with 0.05 FDR | For the male, p=0.05, q=0.21(During); p=0.28, q=0.59(Rebound). For the female, p=0.46, q=0.64(During); p=0.97, q=1(Rebound).                                                                                                                                                                                         |
|                | c             | One sample t test followed by two-stage step-up method of Benjamini, Krieger and Yekutieli with 0.05 FDR        | For the male, df=5, p=0.61, q=0.77(During); df=5, p=0.73, q=0.77(Rebound). For the female,df=6, p=0.34, q=0.77(During); df=6, p=0.53, q=0.77(Rebound).                                                                                                                                                               |
|                | d             | One sample t test followed by two-stage step-up method of Benjamini, Krieger and Yekutieli with 0.05 FDR        | For the male, df=4, p=0.45, q=0.6(During); df=4, p=0.57, q=0.6(Rebound). For the female, df=6, p=0.02, q=0.08 (During); df=6, p=0.15, q=0.32(Rebound).                                                                                                                                                               |
| 8-supplement 2 | e             | One sample t test followed by two-stage step-up method of Benjamini, Krieger and Yekutieli with 0.05 FDR        | df=2, p=0.21, q= 0.38(Eat food); df=2, p=0.27, q=0.38 (Attack); df=2, p=0.09, q=0.38(Foot shock); df=2, p=0.88, q=0.92(Tail suspension).                                                                                                                                                                             |
|                | f             | One sample t test followed by two-stage step-up method of Benjamini, Krieger and Yekutieli with 0.05 FDR        | df=2, p=0.3, q= 0.45(Eat food); df=2, p=0.7, q=0.74 (Attack); df=2, p=0.32, q=0.45(Foot shock); df=2, p=0.13, q=0.45(Tail suspension).                                                                                                                                                                               |

bioRxiv preprint doi: <https://doi.org/10.1101/2021.06.22.449478>; this version posted June 23, 2021. The copyright holder for this preprint (which was not certified by peer review) is the author/funder. All rights reserved. No reuse allowed without permission.
